# Supplementary material
Source: PubMed Central journal article supplement (PMC4520746)

**Supplementary Table1. Description of the studies included in PanC4 Case-Control Consortium**

| <b>Study</b>                    | <b>Cases</b> | <b>Controls</b> | <b>Accrual Years</b> | <b>Source of cases</b>                       | <b>Source of Controls</b>                             | <b>Control Matching</b>          | <b>Age of Diagnosis for Cases (SD)<sup>a</sup></b> | <b>Age of Controls (SD)</b> | <b>Male (%)</b> | <b>Cauc (%)<sup>b</sup></b> |
|---------------------------------|--------------|-----------------|----------------------|----------------------------------------------|-------------------------------------------------------|----------------------------------|----------------------------------------------------|-----------------------------|-----------------|-----------------------------|
| <b>IARC</b>                     | 448          | 456             | 2006-2010            | Academic hospitals                           | General practitioners;                                | Age; sex; region                 | 63.84 (11.16)                                      | 61.88 (11.88)               | 57              | 100                         |
| <b>Johns Hopkins Hospital</b>   | 315          | 81              | 2007-2011            | Clinic                                       | Spouse in-law                                         | None (in-law)                    | 64.29 (11.53)                                      | 63.45 (14.73)               | 51              | 93                          |
| <b>Mayo Clinic</b>              | 1104         | 1027            | 2000-2010            | Clinic                                       | Primary care patients                                 | Age; sex; race; residence        | 65.92 (11.09)                                      | 63.34 (10.58)               | 56              | 93                          |
| <b>MD Anderson</b>              | 616          | 509             | 1997-2007            | Hospital                                     | Friends and spouses of non-pancreatic cancer patients | Age; race; sex                   | 62.6 (9.69)                                        | 59.2 (10.6)                 | 59              | 100                         |
| <b>Memorial Sloan Kettering</b> | 317          | 139             | 2000-2008            | Clinic                                       | Patient Spouses and patient visitors                  | None                             | 64.03 (10.39)                                      | 61.68 (10.98)               | 64              | 87                          |
| <b>Toronto</b>                  | 402          | 401             | 2003-2012            | Population-based cancer registry             | Family medicine clinic database                       | Age; sex; ethnicity              | 64.92 (11.03)                                      | 62.95 (11.73)               | 50              | 85                          |
| <b>Queensland</b>               | 559          | 604             | 2007-2011            | Population-based hospitals & cancer registry | Electoral rolls                                       | Age; sex                         | 66.64 (11.26)                                      | 67.51 (10.91)               | 60              | 96                          |
| <b>UCSF</b>                     | 253          | 248             | 2006-2010            | Two UCSF Clinics                             | Three UCSF Clinics                                    | Frequency matched by age and sex | 62.52 (10.35)                                      | 60.4 (10.96)                | 54              | 82                          |
| <b>YALE</b>                     | 156          | 366             | 2005-2009            | Population-based hospitals & cancer registry | Enhanced RDD                                          | Frequency matched by age and sex | 67.02 (10.43)                                      | 65.15 (10.6)                | 59              | 93                          |
| <b>Total<sup>c</sup></b>        | 4170         | 3831            |                      |                                              |                                                       |                                  | 64.76                                              | 63.09                       | 58              | 95                          |

|  |  |  |  |  |  |  |         |         |  |  |
|--|--|--|--|--|--|--|---------|---------|--|--|
|  |  |  |  |  |  |  | (10.92) | (11.33) |  |  |
|--|--|--|--|--|--|--|---------|---------|--|--|

a- SD- Standard Deviation

b- Percent self-identifying as Caucasian

c- Table excludes the 31 failed samples and 20 samples with unresolved identity issues (See Supplementary Table 2)

**Supplementary Table 2. Quality control steps applied to PanC4 Samples and SNPs**

| <b>Filters Applied</b>                                  | <b>N</b>       |
|---------------------------------------------------------|----------------|
| <b>Samples</b>                                          |                |
| Total Samples Genotyped                                 | 8,052          |
| Failed samples                                          | 31             |
| Unresolved identity issues                              | 20             |
| Relatedness issues                                      | 45             |
| <b>Total Samples Analyzed</b>                           | <b>7,956</b>   |
| <b>SNPs</b>                                             |                |
| Total SNPs Genotyped                                    | 951,117        |
| MAF $\leq$ 0.005                                        | 244,744        |
| Technical failures or missing call rate greater than 2% | 22,865         |
| HWE p-value $<10^{-6}$                                  | 9,477          |
| Positional duplicates                                   | 18,699         |
| More than 1 Mendelian error in HapMap control trios     | 755            |
| More than two discordant calls in study duplicates      | 102            |
| Sex difference in allele frequency greater than 0.2     | 5              |
| <b>Total SNPs Analyzed</b>                              | <b>654,470</b> |

**Supplementary Table 3. Association results for ten loci previously identified in pancreatic cancer GWASs**

| Chr            | Gene <sup>a</sup>     | SNP        | Position <sup>b</sup> | Study <sup>c</sup> | Reported OR (CI) <sup>d</sup> | Reported P-value <sup>e</sup> | PanC4 OR (CI) <sup>f</sup> | PanC4 P-value <sup>g</sup> |
|----------------|-----------------------|------------|-----------------------|--------------------|-------------------------------|-------------------------------|----------------------------|----------------------------|
| <b>9q34</b>    | <i>ABO</i>            | rs505922   | 136149229             | PanScan 1          | 1.2<br>(1.12 - 1.28)          | 5.37 X 10 <sup>-8</sup>       | 1.27<br>(1.19 - 1.35)      | 1.72 X 10 <sup>-13</sup>   |
| <b>13q22.1</b> | <i>KLF5 AND KLF12</i> | rs9543325  | 73916628              | PanScan 2          | 1.26<br>(1.18 - 1.35)         | 3.27 X 10 <sup>-11</sup>      | 1.24<br>(1.16 - 1.32)      | 2.26X 10 <sup>-10</sup>    |
| <b>1q32.1</b>  | <i>NR5A2</i>          | rs3790844  | 200007432             | PanScan 2          | 0.77<br>(0.71 - 0.84)         | 2.45 X 10 <sup>-10</sup>      | 0.83<br>(0.77 - 0.90)      | 3.05 X 10 <sup>-6</sup>    |
| <b>5p15.33</b> | <i>CLPTM1L</i>        | rs401681   | 1322087               | PanScan 2          | 1.19<br>(1.11 - 1.27)         | 3.66 X 10 <sup>-7</sup>       | 1.20<br>(1.13 -1.28)       | 2.70 X 10 <sup>-8</sup>    |
| <b>5p15.33</b> | <i>TERT</i>           | rs2736098  | 1294086               | PanScan 3          | 0.80<br>(0.76 - 0.85)         | 9.78 X 10 <sup>-14</sup>      | 0.85<br>(0.78 - 0.93)      | 2.31 X 10 <sup>-5</sup>    |
| <b>7q32.3</b>  | <i>LINC-PINT</i>      | rs6971499  | 130680521             | PanScan 3          | 0.79<br>(0.74 - 0.84)         | 2.98 X 10 <sup>-12</sup>      | 0.81<br>(0.74 - 0.88)      | 7.10 X 10 <sup>-6</sup>    |
| <b>16q23.1</b> | <i>BCAR1</i>          | rs7190458  | 75263661              | PanScan 3          | 1.46<br>(1.3 - 1.65)          | 1.13 X 10 <sup>-10</sup>      | 1.40<br>(1.22 - 1.60)      | 1.01 X 10 <sup>-4</sup>    |
| <b>13q12.2</b> | <i>PDX1</i>           | rs9581943  | 28493997              | PanScan 3          | 1.15<br>(1.1 - 1.2)           | 2.35 X 10 <sup>-9</sup>       | 1.17<br>(1.10 - 1.24)      | 1.94 X 10 <sup>-7</sup>    |
| <b>22q12.1</b> | <i>ZNRF3</i>          | rs16986825 | 29300306              | PanScan 3          | 1.18<br>(1.12 - 1.25)         | 1.18 X 10 <sup>-8</sup>       | 1.14<br>(1.04 - 1.24)      | 2.72 X 10 <sup>-3</sup>    |
| <b>8q24.21</b> | <i>MIR1208</i>        | rs1561927  | 129568078             | PanScan 3          | 0.87<br>(0.83 - 0.92)         | 1.3 X 10 <sup>-7</sup>        | 0.92<br>(0.85-0.99)        | 2.20 X 10 <sup>-2</sup>    |
| <b>2p13.3</b>  | <i>ETAA1</i>          | rs2035565  | 67,619,656            | China              | 1.33<br>(1.19 - 1.49)         | 5.46x10 <sup>-7</sup>         | 1.15<br>(1.07 - 1.25)      | 2.69 x10 <sup>-4</sup>     |

- RefSeq Gene symbol of the closest gene to the listed SNP. For SNPs not intragenic to the listed gene, the gene is listed in grey.
- Position of the SNP according to NCBI Human Genome Build 37
- GWAS where the SNP was first found to be associated with Pancreatic Cancer
- Odds ratio and Confidence Interval for the SNP in publication listed in the Study column
- P-value listed in the original study
- OR and CI from a test for association of this SNP with pancreatic cancer in the PanC4 Study
- P-value from a test for association of this SNP with pancreatic cancer in the PanC4 Study

**Supplementary Table 4. Quality control steps applied to PanScan 1 and PanScan 2 Samples and SNPs**

| <b>Filters Applied</b>                                  | <b>PanScan 1 N</b> | <b>PanScan 2 N</b> |
|---------------------------------------------------------|--------------------|--------------------|
| <b>Samples</b>                                          |                    |                    |
| Total Samples Genotyped                                 | 3,937              | 3,484              |
| Failed samples                                          | 3                  | 38                 |
| Unresolved identity issues                              | 27                 | 9                  |
| Replicated subjects                                     | 152                | 137                |
| Relatedness issues                                      | 9                  | 0                  |
| <b>Total Samples Analyzed</b>                           | <b>3,746</b>       | <b>3,300</b>       |
| <b>SNPs</b>                                             |                    |                    |
| Total SNPs Genotyped                                    | 561,466            | 620,901            |
| MAF $\leq$ 0.005                                        | 13,701             | 43,531             |
| Technical failures or missing call rate greater than 2% | 12,443             | 16,131             |
| HWE p-value $<10^{-6}$                                  | 7,143              | 3,682              |
| Missingness varying by phenotype (p $<0.00001$ )        | 0                  | 2                  |
| <b>Total SNPs Analyzed</b>                              | <b>528,179</b>     | <b>557,555</b>     |

Supplementary Table 5. Association results for 25 SNPs in Stages 1 and 2

| Chr <sup>a</sup><br>SNP<br>Position <sup>b</sup><br>Gene | Effect Allele<br>(Minor)/<br>Reference<br>Allele | Statistic                                                                  | Stage 1                                                 |                                                         |                                                         |                                                               |                            | Stage 2                                                      |                                |                                    |                            |  |
|----------------------------------------------------------|--------------------------------------------------|----------------------------------------------------------------------------|---------------------------------------------------------|---------------------------------------------------------|---------------------------------------------------------|---------------------------------------------------------------|----------------------------|--------------------------------------------------------------|--------------------------------|------------------------------------|----------------------------|--|
|                                                          |                                                  |                                                                            | PanC4                                                   | PanScan 1                                               | PanScan 2                                               | All Stage 1 <sup>c</sup>                                      | Heterogeneity <sup>d</sup> | PANDoRA                                                      | Heterogeneity <sup>e</sup>     | Combined Stage<br>1&2 <sup>f</sup> | Heterogeneity <sup>g</sup> |  |
| 17q25.1<br>rs11655237<br>70400166<br>LINCO0673           | T/C                                              | maf cases;controls<br>info<br>OR (CI)<br>p-value                           | 0.146; 0.11<br>0.963<br>1.38 (1.26 - 1.52)<br>1.38E-10  | 0.139; 0.129<br>0.96<br>1.09 (0.96 - 1.25)<br>1.95E-01  | 0.149; 0.116<br>0.96<br>1.34 (1.16 - 1.55)<br>2.95E-04  | 1.27 (1.19 - 1.36)<br>0.96<br>6.74E-12                        | 2.29E-02                   | 0.135; 0.114<br>0.135; 0.117<br>1.24 (1.1 - 1.4)<br>6.40E-04 |                                | 1.26 (1.19 - 1.34)<br>1.42E-14     | 7.34E-02                   |  |
| 17q25.1<br>rs7214041<br>70401476<br>LINCO0673            | T/C                                              | maf cases;controls<br>info<br>OR (CI)<br>p-value                           | 0.148; 0.112<br>0.966<br>1.38 (1.26 - 1.51)<br>1.95E-10 | 0.140; 0.133<br>0.96<br>1.07 (0.93 - 1.22)<br>3.36E-01  | 0.150; 0.117<br>0.96<br>1.33 (1.15 - 1.53)<br>3.69E-04  | 2.67E-11<br>0.96<br>1.26 (1.18 - 1.35)<br>2.67E-11            | 1.46E-02                   | 1.25 (1.11 - 1.41)<br>3.37E-04                               | 3.69E-01                       | 1.26 (1.19 - 1.34)<br>2.88E-14     | 8.52E-02                   |  |
| 13q12.2<br>rs9554197<br>28476978<br>PDX1-AS1             | T/C                                              | maf cases;controls<br>info<br>OR (CI)<br>p-value                           | 0.440; 0.399<br>0.96<br>1.18 (1.11 - 1.26)<br>4.22E-08  | 0.428; 0.416<br>0.96<br>1.05 (0.96 - 1.15)<br>3.20E-01  | 0.437; 0.405<br>0.96<br>1.14 (1.03 - 1.26)<br>1.05E-03  | 2.67E-11<br>0.96<br>1.15 (1.1 - 1.21)<br>1.93E-09             | 6.25E-02                   | 1.11 (1.03 - 1.2)<br>1.03E-02                                | 8.35E-01                       | 1.14 (1.1 - 1.19)<br>8.89E-11      | 4.12E-01                   |  |
| rs1486134<br>67639769<br>ETAA1 (2236 bp on 3')           | G/T                                              | maf cases;controls<br>info<br>OR (CI)<br>p-value                           | 0.302; 0.275<br>0.96<br>1.14 (1.06 - 1.22)<br>5.96E-05  | 0.305; 0.292<br>0.96<br>1.06 (0.96 - 1.18)<br>1.57E-01  | 0.305; 0.276<br>0.96<br>1.15 (1.03 - 1.28)<br>5.18E-03  | 8.35E-07<br>0.96<br>1.13 (1.08 - 1.19)<br>5.18E-03            | 4.54E-01                   | 1.16 (1.06 - 1.27)<br>9.42E-04                               | 3.32E-02                       | 1.14 (1.09 - 1.19)<br>3.36E-09     | 8.32E-02                   |  |
| 2p13.3<br>rs962856<br>67593803                           | C/T                                              | maf cases;controls<br>info<br>OR (CI)<br>p-value                           | 0.407; 0.379<br>0.96<br>1.12 (1.06 - 1.20)<br>4.58E-05  | 0.401; 0.391<br>0.96<br>1.04 (0.95 - 1.14)<br>3.40E-01  | 0.406; 0.371<br>0.96<br>1.16 (1.05 - 1.28)<br>1.37E-03  | 1.12 (1.07 - 1.18)<br>0.96<br>1.12 (1.07 - 1.18)<br>8.30E-07  | 1.82E-01                   | 1.12 (1.03 - 1.22)<br>8.05E-03                               | 1.12 (1.08 - 1.17)<br>2.21E-08 | 2.08E-01                           |                            |  |
| 7p13<br>rs17688601<br>40866663<br>SUGCT                  | A/C                                              | maf cases;controls<br>info<br>OR (CI)<br>p-value                           | 0.241; 0.263<br>0.96<br>0.89 (0.83 - 0.96)<br>1.98E-03  | 0.218; 0.254<br>0.96<br>0.82 (0.73 - 0.91)<br>1.66E-04  | 0.237; 0.268<br>0.96<br>0.85 (0.76 - 0.94)<br>8.72E-03  | 9.77E-08<br>0.96<br>0.87 (0.82 - 0.91)<br>9.77E-08            | 3.99E-01                   | 0.91 (0.83 - 1)<br>3.93E-02                                  | 7.25E-02                       | 0.88 (0.84 - 0.92)<br>1.41E-08     | 1.23E-01                   |  |
| 3q29<br>rs9854771<br>189508471<br>TP63                   | A/G                                              | maf cases;controls<br>info<br>OR (CI)<br>p-value                           | 0.328; 0.362<br>0.96<br>0.86 (0.81 - 0.92)<br>3.10E-05  | 0.336; 0.366<br>0.998<br>0.88 (0.80 - 0.97)<br>7.94E-03 | 0.325; 0.356<br>0.998<br>0.87 (0.79 - 0.97)<br>1.55E-02 | 4.08E-08<br>0.998<br>0.87 (0.83 - 0.92)<br>1.55E-02           | 9.71E-01                   | 0.93 (0.86 - 1.01)<br>1.01E-01                               | 8.15E-01                       | 0.89 (0.85 - 0.93)<br>2.35E-08     | 8.61E-01                   |  |
| 18q21.2<br>rs1517037<br>56878274<br>GRP (9126 bp on 5')  | T/C                                              | maf cases;controls<br>info<br>OR (CI)<br>p-value                           | 0.172; 0.182<br>0.96<br>0.93 (0.86 - 1.01)<br>3.39E-02  | 0.170; 0.195<br>0.96<br>0.85 (0.75 - 0.95)<br>3.82E-03  | 0.164; 0.189<br>0.96<br>0.84 (0.74 - 0.95)<br>8.82E-03  | 9.93E-06<br>0.96<br>0.87 (0.82 - 0.93)<br>9.93E-06            | 2.56E-01                   | 0.87 (0.79 - 0.97)<br>1.17E-02                               | 7.73E-02                       | 0.87 (0.83 - 0.92)<br>3.17E-07     | 1.24E-01                   |  |
| 12q24.31<br>rs7310409<br>121424861<br>NF1A               | A/G                                              | maf cases;controls<br>info<br>OR (CI)<br>p-value                           | 0.407; 0.386<br>0.96<br>1.09 (1.02 - 1.16)<br>1.80E-02  | 0.423; 0.375<br>0.96<br>1.22 (1.1 - 1.34)<br>5.35E-05   | 0.421; 0.392<br>0.96<br>1.13 (1.02 - 1.24)<br>1.76E-02  | 1.12 (1.07 - 1.18)<br>0.96<br>1.12 (1.07 - 1.18)<br>1.24E-06  | 1.45E-01                   | 1.07 (0.98 - 1.16)<br>1.26E-01                               | 9.95E-01                       | 1.11 (1.06 - 1.15)<br>6.34E-07     | 7.08E-01                   |  |
| 1p13.1<br>rs351365<br>113046395<br>WNT2B                 | T/C                                              | maf cases;controls<br>info<br>OR (CI)<br>p-value                           | 0.228; 0.257<br>0.96<br>0.85 (0.79 - 0.92)<br>3.08E-05  | 0.24; 0.254<br>0.891<br>0.93 (0.84 - 1.03)<br>1.62E-01  | 0.239; 0.258<br>0.889<br>0.91 (0.81 - 1.01)<br>4.45E-02 | 2.72E-06<br>0.889<br>0.88 (0.83 - 0.93)<br>2.72E-06           | 5.21E-01                   | 0.92 (0.83 - 1.01)<br>8.02E-02                               | 3.97E-01                       | 0.89 (0.85 - 0.93)<br>7.39E-07     | 5.33E-01                   |  |
| 20q13.11<br>rs6073450<br>43086648                        | A/G                                              | maf cases;controls<br>info<br>OR (CI)<br>p-value                           | 0.415; 0.381<br>0.96<br>1.15 (1.08 - 1.23)<br>1.82E-04  | 0.429; 0.411<br>0.96<br>1.08 (0.98 - 1.18)<br>1.20E-01  | 0.411; 0.384<br>0.96<br>1.12 (1.02 - 1.24)<br>2.62E-02  | 6.01E-06<br>0.96<br>1.12 (1.06 - 1.17)<br>6.01E-06            | 6.79E-01                   | 1.09 (1 - 1.18)<br>4.92E-02                                  | 9.03E-01                       | 1.11 (1.06 - 1.15)<br>9.21E-07     | 9.52E-01                   |  |
| 17q25.1<br>rs11652288<br>70405340<br>LINCO0673           | G/A                                              | maf cases;controls<br>info<br>OR (CI)<br>p-value                           | 0.312; 0.282<br>0.96<br>1.15 (1.08 - 1.23)<br>1.04E-04  | 0.292; 0.281<br>0.892<br>1.05 (0.95 - 1.16)<br>2.42E-01 | 0.317; 0.29<br>0.892<br>1.14 (1.02 - 1.26)<br>2.56E-02  | 8.90E-06<br>0.892<br>1.13 (1.07 - 1.18)<br>8.90E-06           | 4.98E-01                   | 1.07 (0.98 - 1.17)<br>1.52E-01                               | 5.59E-01                       | 1.11 (1.06 - 1.16)<br>4.53E-06     | 6.11E-01                   |  |
| 1p31.3<br>rs1747924<br>64538961<br>ROR1                  | C/A                                              | maf cases;controls<br>info <sup>d</sup><br>OR (CI) <sup>d</sup><br>p-value | 0.222; 0.233<br>0.96<br>0.94 (0.87 - 1.01)<br>2.38E-02  | 0.207; 0.233<br>0.96<br>0.86 (0.77 - 0.96)<br>4.06E-03  | 0.220; 0.243<br>0.96<br>0.88 (0.78 - 0.98)<br>3.13E-03  | 9.16E-06<br>0.96<br>0.88 (0.84 - 0.93)<br>9.16E-06            | 3.33E-01                   | 0.94 (0.85 - 1.03)<br>1.94E-01                               | 0.9 (0.86 - 0.94)<br>6.74E-06  | 2.12E-01                           |                            |  |
| 21q11.2<br>rs1822660<br>22658894<br>NCAM2                | A/G                                              | maf cases;controls<br>info<br>OR (CI)<br>p-value                           | 0.494; 0.464<br>0.96<br>1.13 (1.06 - 1.20)<br>2.19E-05  | 0.234; 0.227<br>0.96<br>1.04 (0.93 - 1.16)<br>5.61E-02  | 0.247; 0.209<br>0.96<br>1.24 (1.11 - 1.40)<br>6.53E-04  | 8.86E-07<br>0.96<br>1.15 (1.09 - 1.22)<br>8.86E-07            | 6.72E-02                   | 1.02 (0.93 - 1.11)<br>7.41E-01                               | 9.29E-02                       | 1.11 (1.06 - 1.17)<br>1.08E-05     | 1.01E-02                   |  |
| 4q26<br>rs1380376<br>118636270                           | G/A                                              | maf cases;controls<br>info<br>OR (CI)<br>p-value                           | 0.111; 0.098<br>0.999<br>1.15 (1.03 - 1.27)<br>2.35E-02 | 0.117; 0.099<br>0.96<br>1.20 (1.04 - 1.39)<br>9.52E-03  | 0.117; 0.088<br>0.96<br>1.38 (1.17 - 1.62)<br>3.64E-04  | 1.19 (1.11 - 1.28)<br>0.96<br>1.19 (1.11 - 1.28)<br>4.38E-06  | 1.91E-01                   | 1.05 (0.93 - 1.2)<br>4.04E-01                                | 1.46E-01                       | 1.15 (1.08 - 1.23)<br>1.22E-05     | 7.74E-02                   |  |
| 9q31.3<br>rs10991043<br>106797388                        | C/T                                              | maf cases;controls<br>info<br>OR (CI)<br>p-value                           | 0.407; 0.366<br>0.96<br>1.19 (1.12 - 1.27)<br>7.00E-08  | 0.391; 0.371<br>0.96<br>1.09 (0.99 - 1.2)<br>5.18E-02   | 0.390; 0.388<br>0.96<br>1 (0.91 - 1.11)<br>7.09E-01     | 5.10E-07<br>0.96<br>1.13 (1.08 - 1.18)<br>5.10E-07            | 2.56E-02                   | 1 (0.92 - 1.08)<br>9.19E-01                                  | 3.02E-01                       | 1.1 (1.05 - 1.14)<br>1.35E-05      | 1.05E-02                   |  |
| 15q22.32<br>rs8024986<br>73024868<br>BBS4                | C/T                                              | maf cases;controls<br>info<br>OR (CI)<br>p-value                           | 0.376; 0.354<br>0.96<br>1.10 (1.03 - 1.17)<br>1.25E-02  | 0.383; 0.357<br>0.999<br>1.12 (1.02 - 1.23)<br>9.68E-03 | 0.400; 0.356<br>0.999<br>1.21 (1.09 - 1.33)<br>2.30E-03 | 1.12 (1.06 - 1.17)<br>0.999<br>1.12 (1.06 - 1.17)<br>6.30E-06 | 1.00E+00                   | 1.04 (0.95 - 1.13)<br>4.13E-01                               | 2.28E-01                       | 1.1 (1.05 - 1.14)<br>1.37E-05      | 2.11E-01                   |  |
| 6q25.2<br>rs7762516<br>154806742<br>CNKSR3               | C/T                                              | maf cases;controls<br>info<br>OR (CI)<br>p-value                           | 0.300; 0.268<br>0.96<br>1.17 (1.09 - 1.25)<br>1.90E-05  | 0.288; 0.261<br>0.776<br>1.15 (1.04 - 1.27)<br>3.17E-03 | 0.290; 0.285<br>0.744<br>1.02 (0.92 - 1.14)<br>8.81E-01 | 1.14 (1.08 - 1.2)<br>0.744<br>1.14 (1.08 - 1.2)<br>2.21E-06   | 1.04E-01                   | 1.02 (0.94 - 1.12)<br>6.29E-01                               | 2.11E-01                       | 1.11 (1.06 - 1.16)<br>1.82E-05     | 4.34E-02                   |  |
| 1p22.3<br>rs318405<br>83014374                           | G/A                                              | maf cases;controls<br>info<br>OR (CI)<br>p-value                           | 0.448; 0.481<br>0.96<br>0.88 (0.82 - 0.93)<br>5.69E-05  | 0.472; 0.493<br>0.96<br>0.92 (0.84 - 1)<br>5.69E-02     | 0.449; 0.474<br>0.96<br>0.91 (0.82 - 1)<br>6.22E-02     | 2.15E-06<br>0.96<br>0.9 (0.86 - 0.94)<br>2.15E-06             | 6.88E-01                   | 0.99 (0.91 - 1.07)<br>8.10E-01                               | 2.66E-02                       | 0.92 (0.88 - 0.95)<br>2.19E-05     | 2.13E-02                   |  |
| 12q24.21<br>rs10850078<br>113209519                      | G/A                                              | maf cases;controls<br>info<br>OR (CI)<br>p-value                           | 0.436; 0.408<br>0.96<br>1.12 (1.05 - 1.2)<br>1.56E-03   | 0.439; 0.414<br>0.96<br>1.11 (1.01 - 1.21)<br>1.63E-02  | 0.452; 0.42<br>0.96<br>1.14 (1.03 - 1.25)<br>2.85E-02   | 1.11 (1.06 - 1.17)<br>0.96<br>1.11 (1.06 - 1.17)<br>6.29E-06  | 9.80E-01                   | 1.02 (0.94 - 1.11)<br>6.26E-01                               | 1.79E-01                       | 1.09 (1.05 - 1.13)<br>2.98E-05     | 2.11E-01                   |  |
| 1q42.2<br>rs1317764<br>230877400                         | G/T                                              | maf cases;controls<br>info<br>OR (CI)<br>p-value                           | 0.484; 0.465<br>0.96<br>1.08 (1.01 - 1.15)<br>1.79E-04  | 0.491; 0.465<br>0.96<br>1.11 (1.01 - 1.21)<br>2.37E-02  | 0.480; 0.465<br>0.96<br>1.06 (0.96 - 1.17)<br>2.88E-02  | 1.12 (1.07 - 1.17)<br>0.96<br>1.12 (1.07 - 1.17)<br>1.12E-06  | 9.62E-01                   | 0.98 (0.9 - 1.06)<br>6.53E-01                                | 6.43E-01                       | 1.09 (1.04 - 1.13)<br>5.72E-05     | 1.87E-01                   |  |
| 5q35.2<br>rs6894235<br>173285545                         | A/G                                              | maf cases;controls<br>info<br>OR (CI)<br>p-value                           | 0.208; 0.224<br>0.96<br>0.91 (0.84 - 0.98)<br>8.44E-03  | 0.199; 0.213<br>0.96<br>0.92 (0.82 - 1.03)<br>1.27E-01  | 0.204; 0.24<br>0.96<br>0.81 (0.72 - 0.91)<br>1.29E-04   | 7.23E-06<br>0.96<br>0.88 (0.83 - 0.93)<br>7.23E-06            | 1.64E-01                   | 1.01 (0.91 - 1.11)<br>9.20E-01                               | 5.39E-02                       | 0.91 (0.87 - 0.95)<br>1.10E-04     | 1.14E-02                   |  |
| 10q26.3<br>rs7086546<br>130347966                        | C/T                                              | maf cases;controls<br>info<br>OR (CI)<br>p-value                           | 0.101; 0.085<br>0.96<br>1.21 (1.09 - 1.35)<br>2.37E-03  | 0.1; 0.088<br>0.96<br>1.16 (0.99 - 1.36)<br>5.63E-02    | 0.114; 0.091<br>0.96<br>1.3 (1.11 - 1.52)<br>5.82E-03   | 8.23E-06<br>0.96<br>1.2 (1.11 - 1.29)<br>8.23E-06             | 7.82E-01                   | 0.88 (0.76 - 1.02)<br>9.31E-02                               | 6.14E-01                       | 1.12 (1.04 - 1.2)<br>1.84E-03      | 2.94E-02                   |  |
| 8q22.3<br>rs16867971<br>102609456<br>GRHL2               | C/T                                              | maf cases;controls<br>info<br>OR (CI)<br>p-value                           | 0.431; 0.391<br>0.96<br>1.18 (1.11 - 1.26)<br>6.85E-06  | 0.383; 0.397<br>0.99<br>0.94 (0.86 - 1.03)<br>2.13E-01  | 0.420; 0.420<br>0.99<br>1 (0.91 - 1.1)<br>4.12E-01      | 1.05 (1.01 - 1.1)<br>0.99<br>1.05 (1.01 - 1.1)<br>2.64E-02    | 2.52E-04                   | 1.06 (0.98 - 1.16)<br>1.47E-01                               | 7.04E-01                       | 1.06 (1.01 - 1.1)<br>8.15E-03      | 8.92E-03                   |  |
| 2p11.2<br>rs6706539<br>84381680                          | A/G                                              | maf cases;controls<br>info<br>OR (CI)<br>p-value                           | 0.440; 0.478<br>0.96<br>0.86 (0.80 - 0.91)<br>3.44E-06  | 0.471; 0.445<br>0.773<br>1.11 (1.01 - 1.22)<br>8.63E-03 | 0.474; 0.457<br>0.758<br>1.07 (0.92 - 1.18)<br>4.71E-02 | 0.96 (0.92 - 1.01)<br>0.758<br>0.96 (0.92 - 1.01)<br>1.29E-01 | 3.05E-07                   | 1.06 (0.98 - 1.15)<br>1.52E-01                               | 1.68E-01                       | 0.99 (0.95 - 1.03)<br>5.69E-01     | 1.46E-06                   |  |

a Cytogenetic regions according to NCBI Human Genome Build 37

b SNP position according to NCBI Human Genome Build 37

c Results from the meta-analysis of Stage 1: PanC4, PanScan 1, and PanScan 2

d P-value from test of heterogeneity of the Stage 1 studies (PanC4, PanScan 1, and PanScan 2)

e P-value from test of heterogeneity of the PANDoRA countries

f Results from the meta-analysis of Stage 1 and Stage 2: PanC4, PanScan 1, PanScan 2, and PANDoRA

g P-value from test of heterogeneity of the Stage 1 and Stage 2 studies (PanC4, PanScan 1, PanScan 2, and PANDoRA)

h Minor allele frequency

i Quality of imputation metric. See online methods for more detail. If snp is genotyped and not imputed, a 'g' is reported

j Allelic Odds Ratio and corresponding 95% Confidence Interval

**Supplementary Table 6. PANDoRA features**

|                   | <b>Pre Quality Control Filters</b> |                 | <b>Post Quality Control Filters</b> |                 |
|-------------------|------------------------------------|-----------------|-------------------------------------|-----------------|
|                   | <b>Cases</b>                       | <b>Controls</b> | <b>Cases</b>                        | <b>Controls</b> |
| <b>By Country</b> |                                    |                 |                                     |                 |
| Germany           | 1166                               | 1800            | 1071                                | 1729            |
| Italy             | 983                                | 1702            | 914                                 | 1448            |
| Czech Republic    | 60                                 | 542             | 57                                  | 531             |
| Lithuania         | 58                                 | 192             | 57                                  | 174             |
| Poland            | 106                                | 207             | 90                                  | 173             |
| Greece            | 124                                | 168             | 98                                  | 150             |
|                   |                                    |                 |                                     |                 |
| <b>By Gender</b>  |                                    |                 |                                     |                 |
| Men               | 1392                               | 2415            | 1307                                | 2265            |
| Women             | 1066                               | 2126            | 980                                 | 1940            |
| Missing (%)       | 1.56                               | 1.52            | 0                                   | 0               |
|                   |                                    |                 |                                     |                 |
| <b>By Age</b>     |                                    |                 |                                     |                 |
| Mean (SD)         | 59.81 (10.35)                      | 53.53 (11.21)   | 59.87 (10.39)                       | 53.56 (11.19)   |
| Missing (%)       | 2.36                               | 6.96            | 0                                   | 0               |
|                   |                                    |                 |                                     |                 |
| <b>Total</b>      | <b>2497</b>                        | <b>4611</b>     | <b>2287</b>                         | <b>4205</b>     |

**Supplementary Table 7. Association results for loci highly suggestive ( $P < 1 \times 10^{-6}$ ) for pancreatic cancer**

|                                                                 |                                                     |                       | Stage 1                                |                                             |                                                |                                                                   | Stage 2                                |                                                                      |
|-----------------------------------------------------------------|-----------------------------------------------------|-----------------------|----------------------------------------|---------------------------------------------|------------------------------------------------|-------------------------------------------------------------------|----------------------------------------|----------------------------------------------------------------------|
| Chr <sup>a</sup><br>SNP<br>Position <sup>b</sup><br>Gene        | Effect<br>Allele<br>(Minor)/<br>Reference<br>Allele | Statistic             | PanC4<br>4,164 cases<br>3,792 controls | PanScan 1<br>1,856 cases,<br>1,890 controls | PanScan 2<br>1,618 cases and<br>1,682 controls | Combined<br>Stage 1 <sup>c</sup><br>7,638 cases<br>7,364 controls | PANDoRA<br>2497 cases 4611<br>controls | Combined<br>Stage 1&2 <sup>d</sup><br>9,925 cases<br>11,569 controls |
| 18q21.2<br>rs1517037<br>56,878,274<br><i>GRP</i><br>(9126bp 5') | T/C                                                 | maf<br>cases;controls | 0.172; 0.182                           | 0.170; 0.195                                | 0.164; 0.189                                   |                                                                   | 0.168; 0.187                           |                                                                      |
|                                                                 |                                                     | info                  | g                                      | g                                           | g                                              |                                                                   |                                        |                                                                      |
|                                                                 |                                                     | OR (CI)               | 0.93<br>(0.86 - 1.01)                  | 0.85<br>(0.75 - 0.95)                       | 0.84<br>(0.74 - 0.95)                          | 0.87<br>(0.82 - 0.93)                                             | 0.87<br>(0.79 - 0.97)                  | 0.87<br>(0.83 - 0.92)                                                |
|                                                                 |                                                     | p-value               | $3.39 \times 10^{-2}$                  | $3.82 \times 10^{-3}$                       | $1.82 \times 10^{-3}$                          | $9.93 \times 10^{-6}$                                             | $1.17 \times 10^{-2}$                  | $3.17 \times 10^{-7}$                                                |
| 12q24.31<br>rs7310409<br>121,424,861<br><i>HNF1A</i>            | A/G                                                 | maf<br>cases;controls | 0.407; 0.386                           | 0.423; 0.375                                | 0.421; 0.392                                   |                                                                   | 0.426; 0.415                           |                                                                      |
|                                                                 |                                                     | info                  | g                                      | g                                           | g                                              |                                                                   |                                        |                                                                      |
|                                                                 |                                                     | OR (CI)               | 1.09<br>(1.02 - 1.16)                  | 1.22<br>(1.11 - 1.34)                       | 1.13<br>(1.02 - 1.24)                          | 1.12<br>(1.07 - 1.18)                                             | 1.07<br>(0.98 - 1.16)                  | 1.11<br>(1.06 - 1.15)                                                |
|                                                                 |                                                     | p-value               | $1.80 \times 10^{-2}$                  | $5.35 \times 10^{-5}$                       | $1.76 \times 10^{-2}$                          | $1.24 \times 10^{-6}$                                             | $1.26 \times 10^{-1}$                  | $6.34 \times 10^{-7}$                                                |
| 1p13.1<br>rs351365<br>113,046,395<br><i>WNT2B</i>               | T/C                                                 | maf<br>cases;controls | 0.228; 0.257                           | 0.240; 0.254                                | 0.239; 0.258                                   |                                                                   | 0.229; 0.248                           |                                                                      |
|                                                                 |                                                     | info                  | g                                      | 0.891                                       | 0.889                                          |                                                                   |                                        |                                                                      |
|                                                                 |                                                     | OR (CI)               | 0.85<br>(0.79 - 0.92)                  | 0.93<br>(0.84 - 1.03)                       | 0.91<br>(0.81 - 1.01)                          | 0.88<br>(0.83 - 0.93)                                             | 0.92<br>(0.83 - 1.01)                  | 0.89<br>(0.85 - 0.93)                                                |
|                                                                 |                                                     | p-value               | $3.08 \times 10^{-5}$                  | $1.62 \times 10^{-1}$                       | $4.45 \times 10^{-2}$                          | $2.72 \times 10^{-6}$                                             | $8.02 \times 10^{-2}$                  | $7.39 \times 10^{-7}$                                                |
| 20q13.11<br>rs6073450<br>43,086,648                             | A/G                                                 | maf<br>cases;controls | 0.415; 0.381                           | 0.429; 0.411                                | 0.411; 0.384                                   |                                                                   | 0.413; 0.403                           |                                                                      |
|                                                                 |                                                     | info                  | g                                      | g                                           | g                                              |                                                                   |                                        |                                                                      |
|                                                                 |                                                     | OR (CI)               | 1.15<br>(1.08 - 1.23)                  | 1.08<br>(0.98 - 1.18)                       | 1.12<br>(1.02 - 1.24)                          | 1.12<br>(1.06 - 1.17)                                             | 1.09<br>(1.00 - 1.18)                  | 1.11<br>(1.06 - 1.15)                                                |
|                                                                 |                                                     | p-value               | $1.82 \times 10^{-4}$                  | $1.20 \times 10^{-1}$                       | $2.62 \times 10^{-2}$                          | $6.01 \times 10^{-6}$                                             | $4.92 \times 10^{-2}$                  | $9.21 \times 10^{-7}$                                                |

|                                  |     |                       |                         |                         |                         |                         |                         |                         |
|----------------------------------|-----|-----------------------|-------------------------|-------------------------|-------------------------|-------------------------|-------------------------|-------------------------|
| 9q31.3<br>rs6073450<br>106797388 | C/T | maf<br>cases;controls | 0.407; 0.366            | 0.391; 0.371            | 0.390; 0.388            |                         | 0.365; 0.364            |                         |
|                                  |     | info                  | g                       | g                       | g                       |                         |                         |                         |
|                                  |     | OR (CI)               | 1.19<br>(1.12 - 1.27)   | 1.09<br>(0.99 - 1.2)    | 1.00<br>(0.91 - 1.11)   | 1.13<br>(1.08 - 1.18)   | 1.00<br>(0.92 - 1.08)   | 1.10<br>(1.05 - 1.14)   |
|                                  |     | p-value               | 7.00 X 10 <sup>-8</sup> | 5.18 X 10 <sup>-2</sup> | 7.09 X 10 <sup>-1</sup> | 5.10 X 10 <sup>-7</sup> | 9.19 X 10 <sup>-1</sup> | 1.35 X 10 <sup>-5</sup> |

<sup>a</sup> Cytogenetic regions according to NCBI Human Genome Build 37 and NCBI's Map Viewer

<sup>b</sup> SNP position according to NCBI Human Genome Build 37

<sup>c</sup> Results from the Combined Stage 1 meta-analysis of PanC4, PanScan 1, and PanScan 2

<sup>d</sup> Results from the Combined Stage 1 and 2 meta-analysis of PanC4, PanScan 1, PanScan 2, and PANDoRA

<sup>e</sup> MAF- minor allele frequency

<sup>f</sup> Quality of imputation metric. See online methods for more detail. If snp is genotyped and not imputed, a 'g' is reported

<sup>g</sup> Allelic Odds Ratio and corresponding 95% Confidence Interval

<sup>h</sup> R<sup>2</sup>>0.95

**Supplementary Figure 1.** Quantile-Quantile (Q-Q) plot of association results from PanC4 analysis

**Supplementary Figure 2.** Quantile-Quantile (Q-Q) plot of association results from the Combined Stage 1 analysis

**Supplementary Figure 3.** Regional association and linkage disequilibrium (LD) plots for five suggestive loci: (a) 12q24.31 (b) 18q21.2, (c) 1p13.1, (d) 20q13.11, and (e) 9q31.3. Association p-values are shown for three analyses: PanC4 only (black circles), Combined Stage 1 (PanC4, PanScan 1, and PanScan 2) (grey circles), and Combined Stage 1 and 2 (PanC4, PanScan 1, PanScan 2, and PANDORA) (red circles). LD plots are based on 1000 Genomes European samples

**Supplementary Figure 4.** Plot of the first two eigenvectors from a principal components analysis of PanC4

**Supplementary Figure 5a-5i.** Forest plots for the nine top associations reported

Supplementary Figure 1

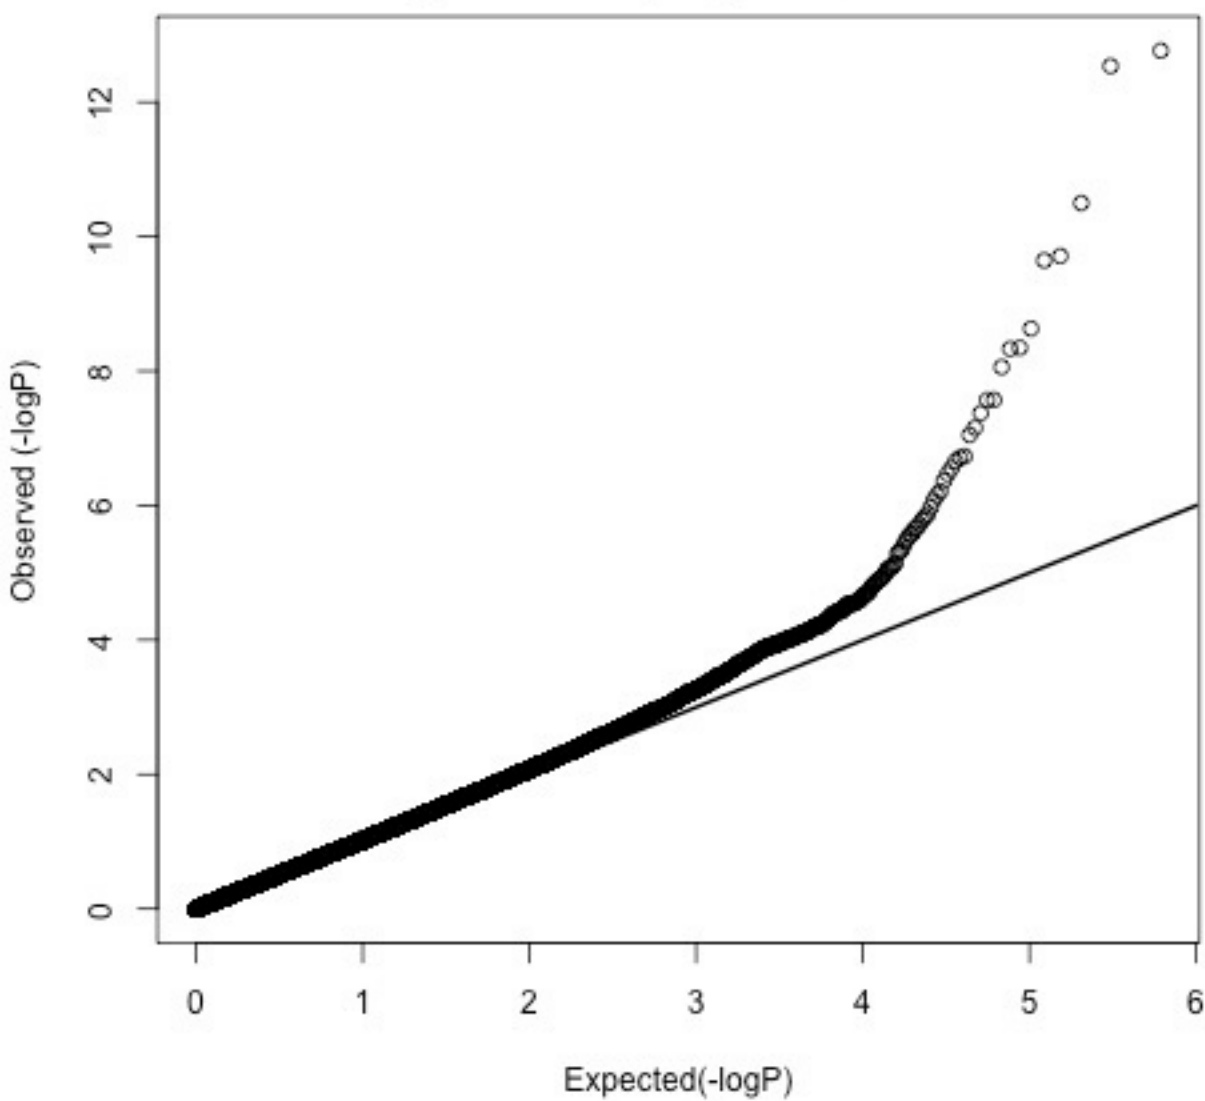

Supplementary Figure 2

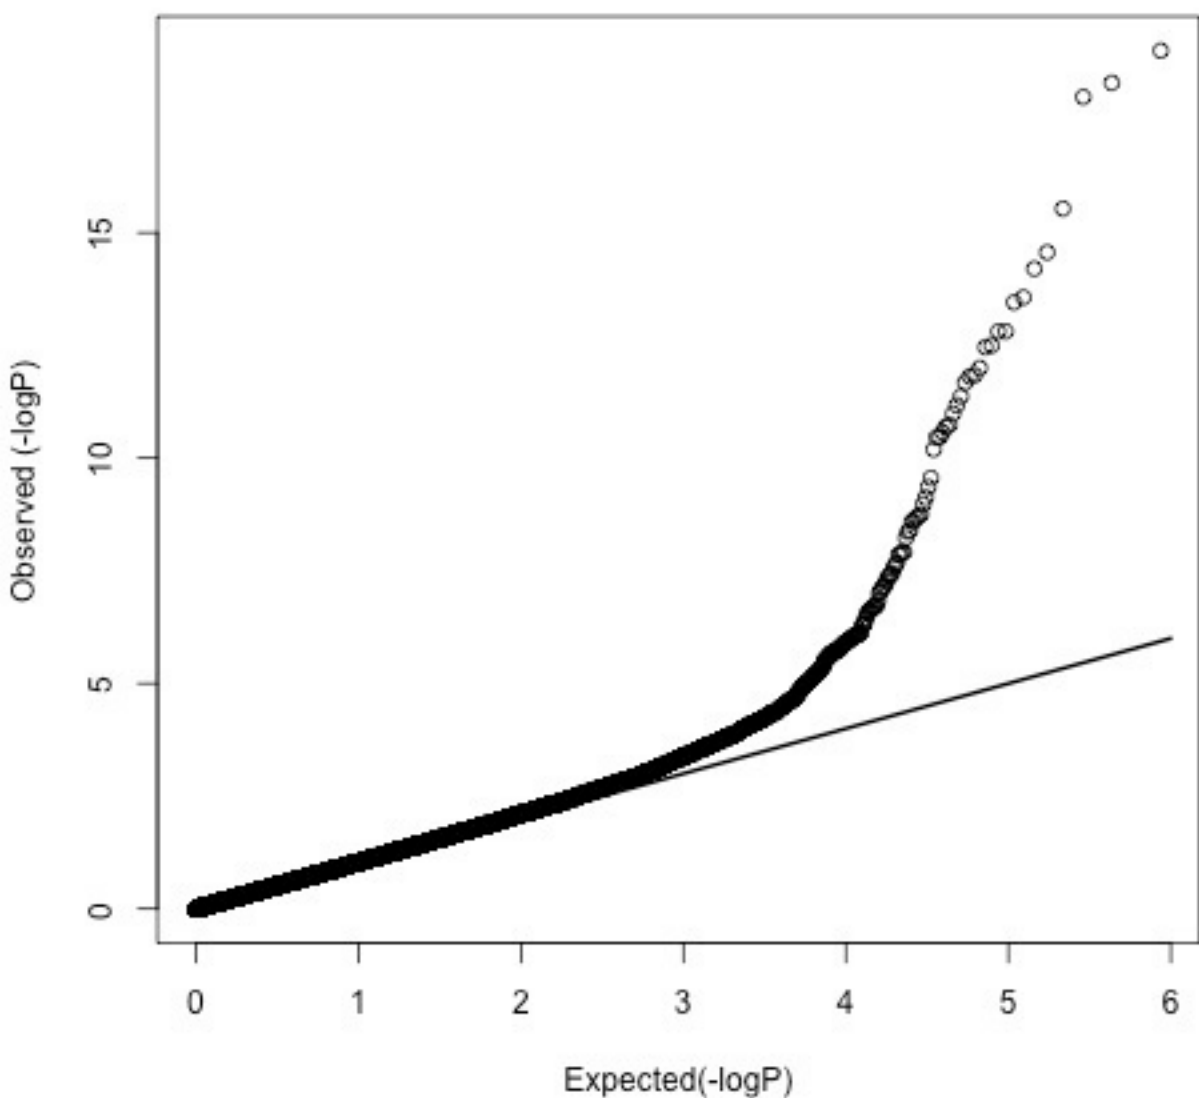

Supplementary Figure 3a

12q24.31

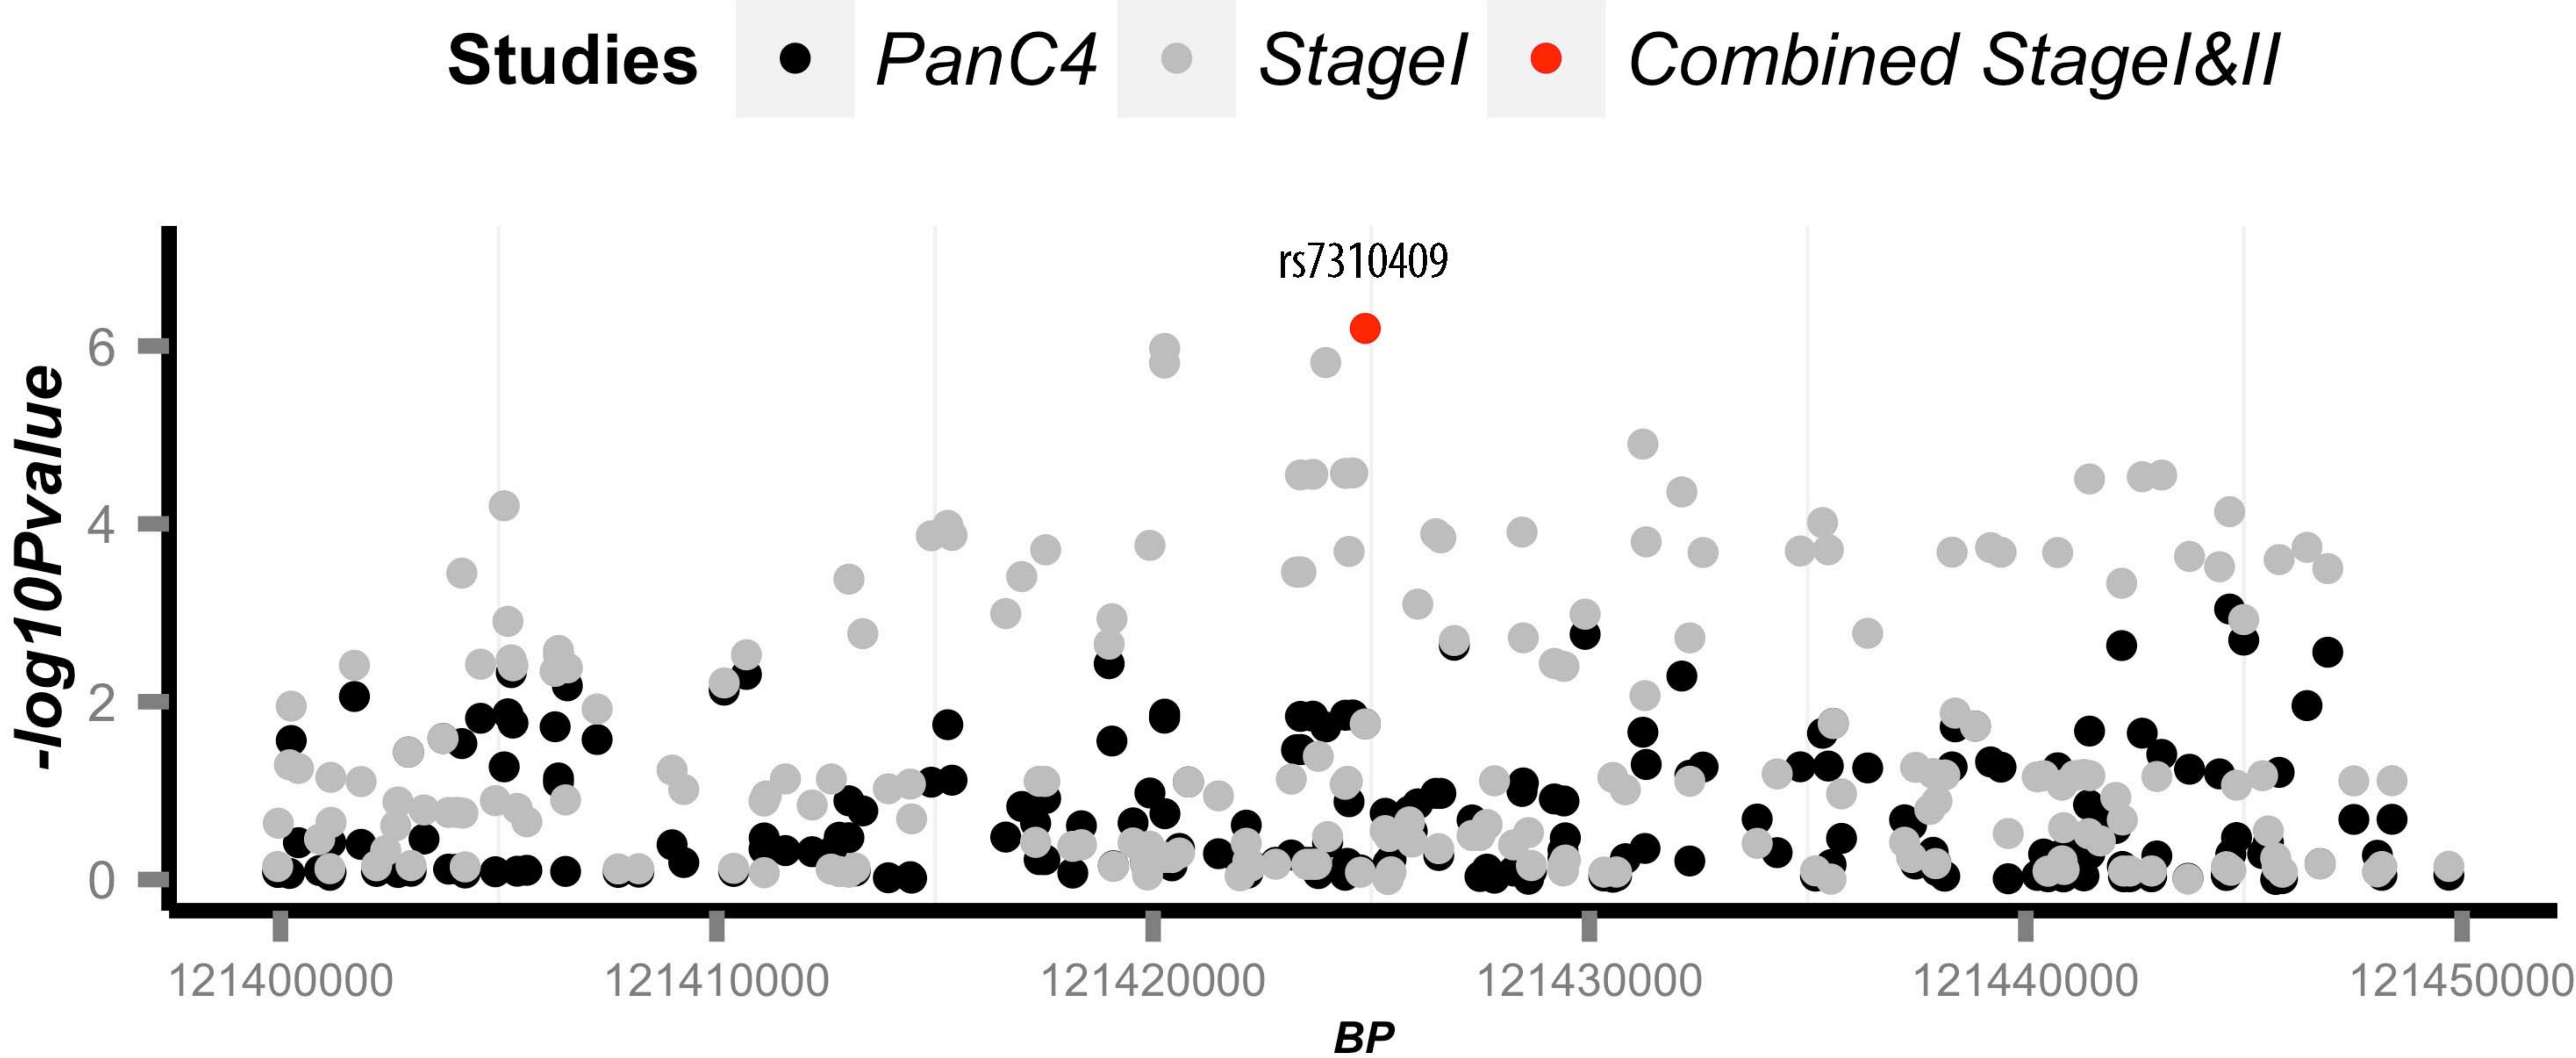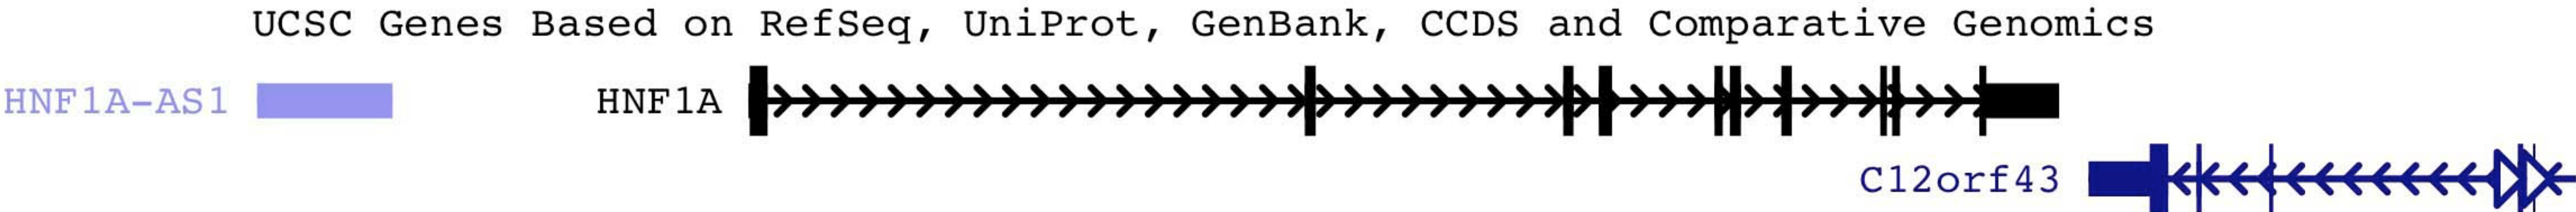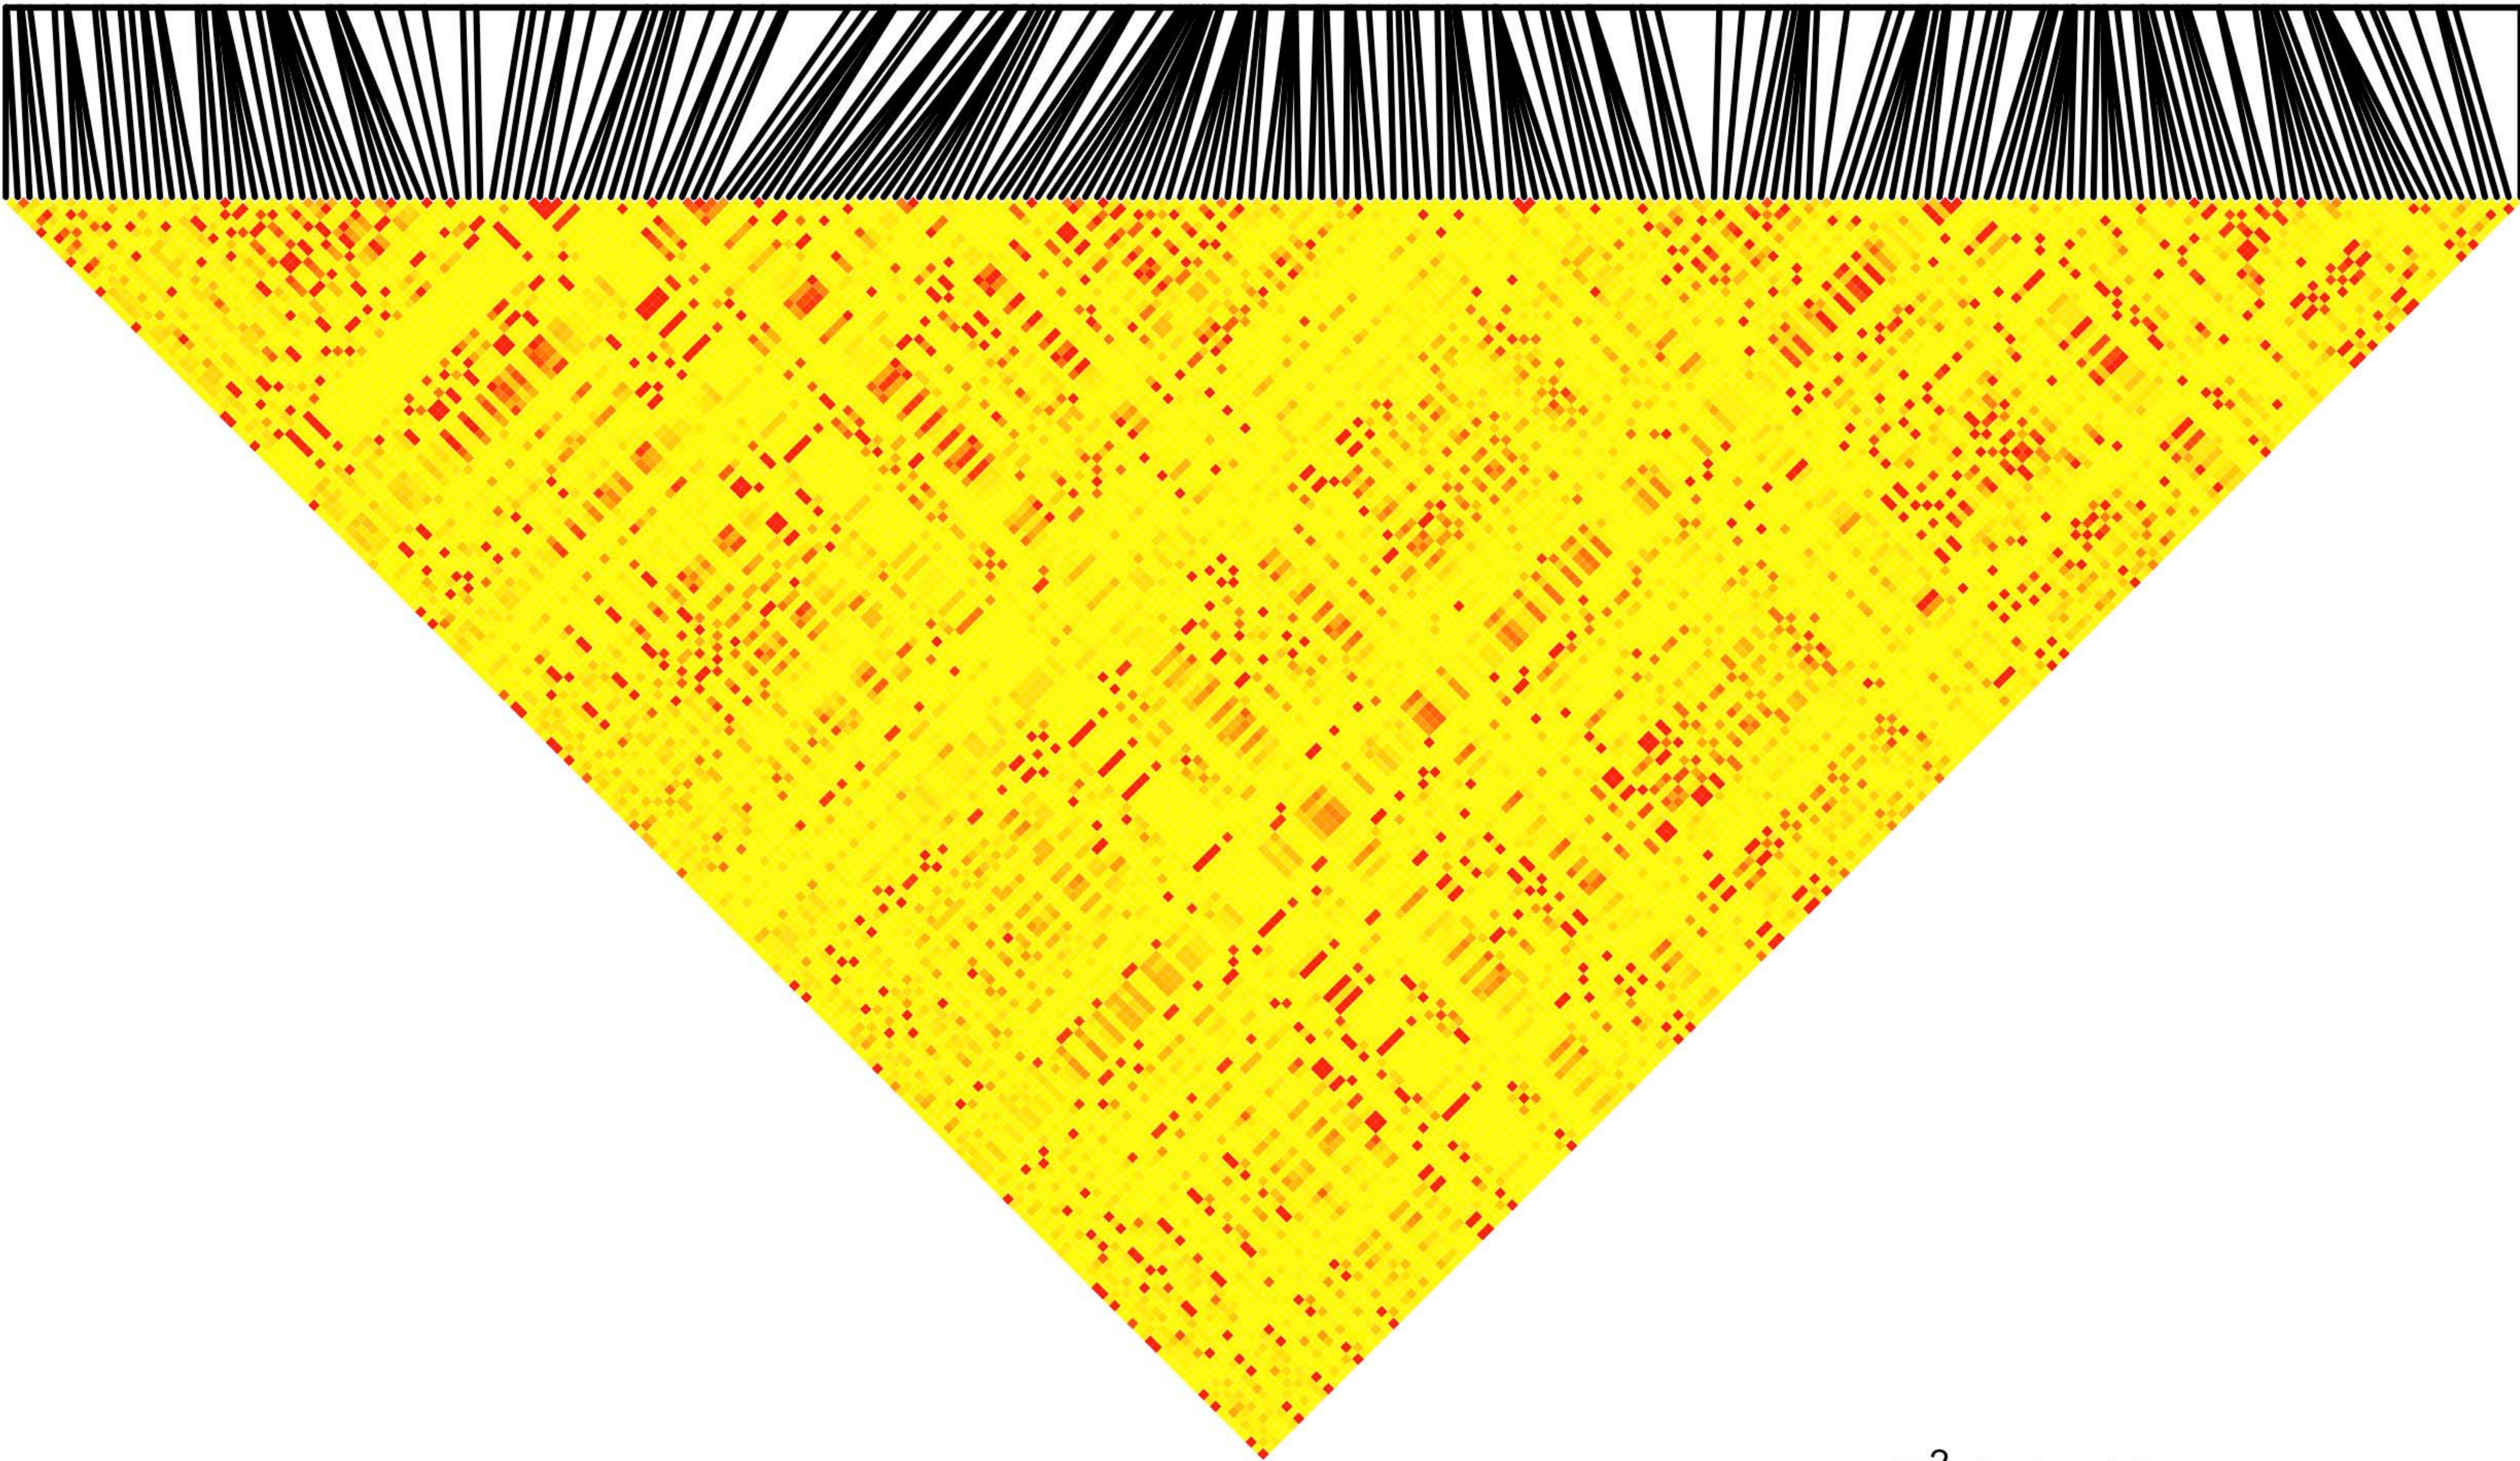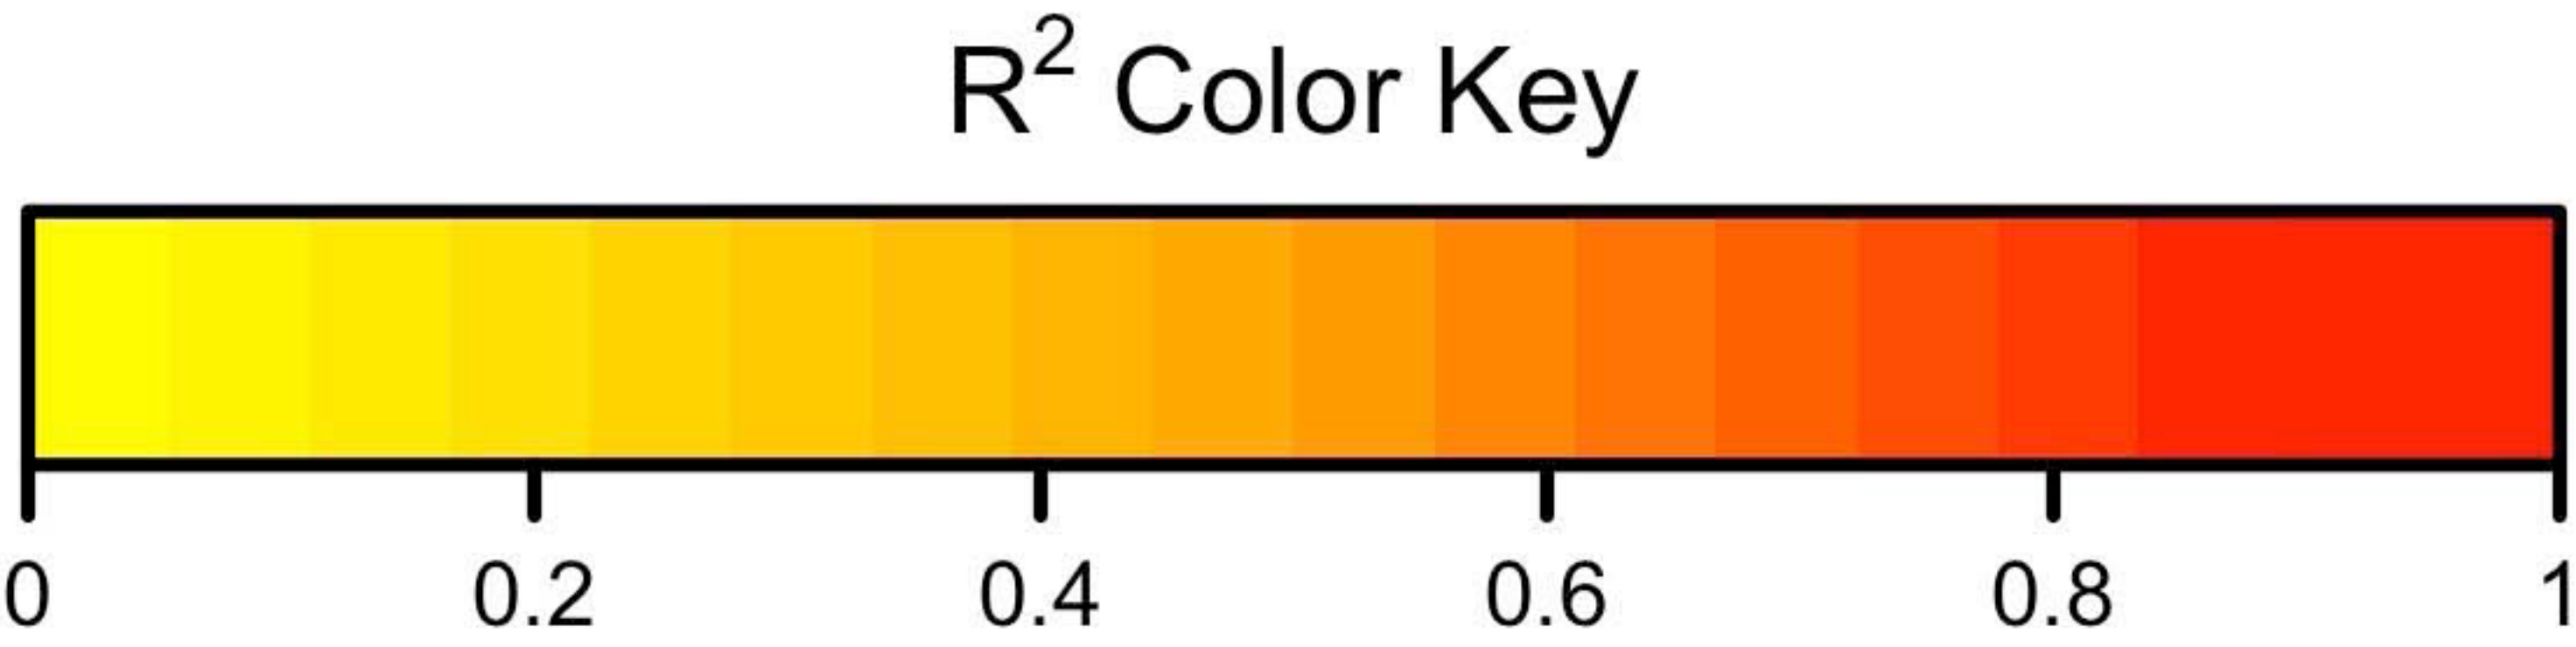

Supplementary Figure 3b 18q21.2

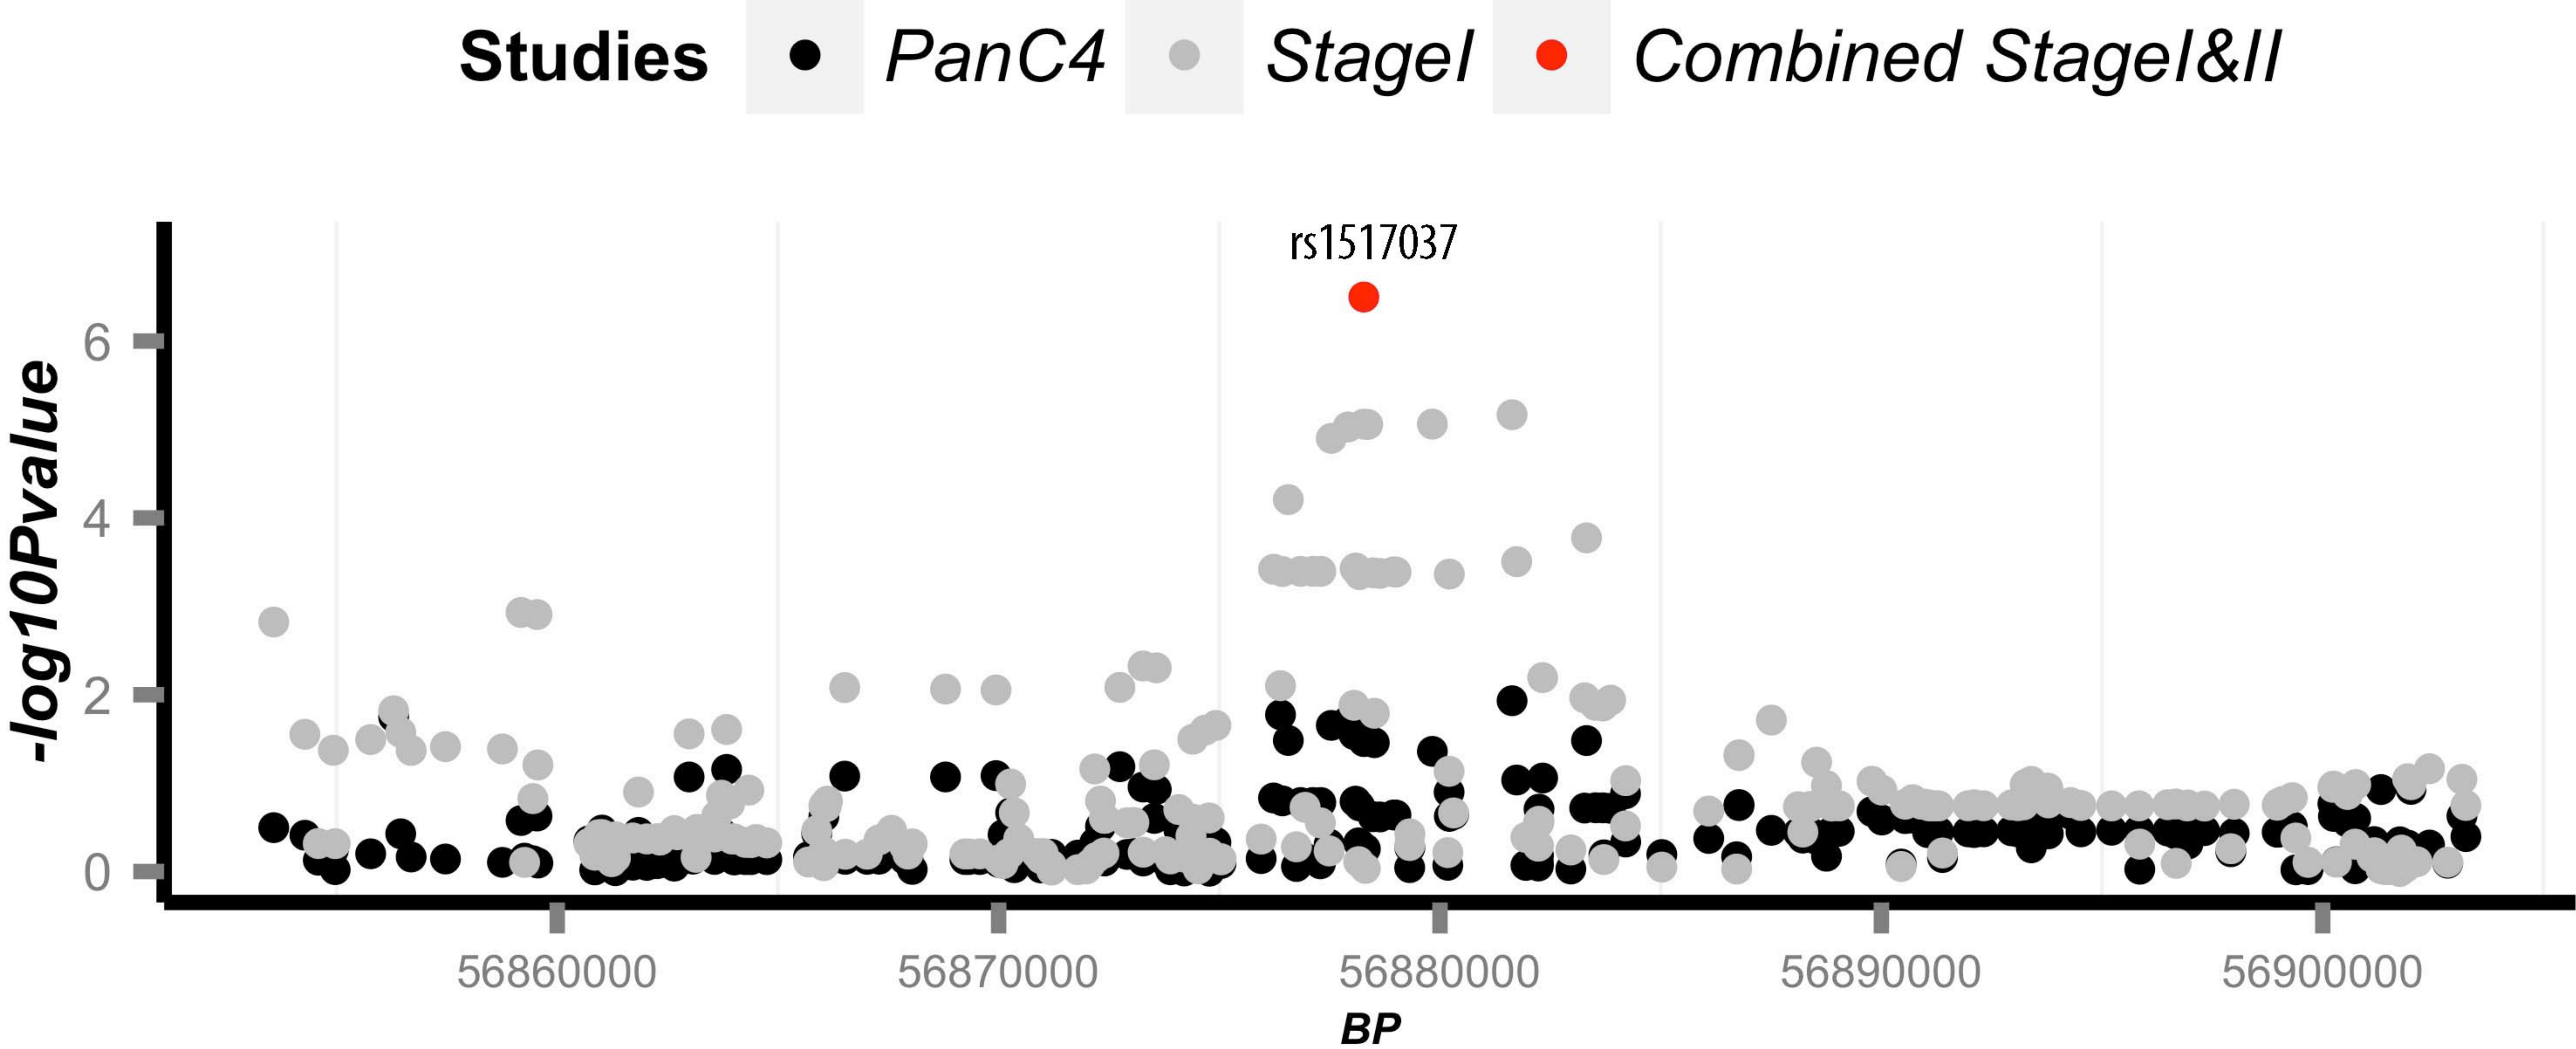

UCSC Genes Based on RefSeq, UniProt, GenBank, CCDS and Comparative Genomics

GRP

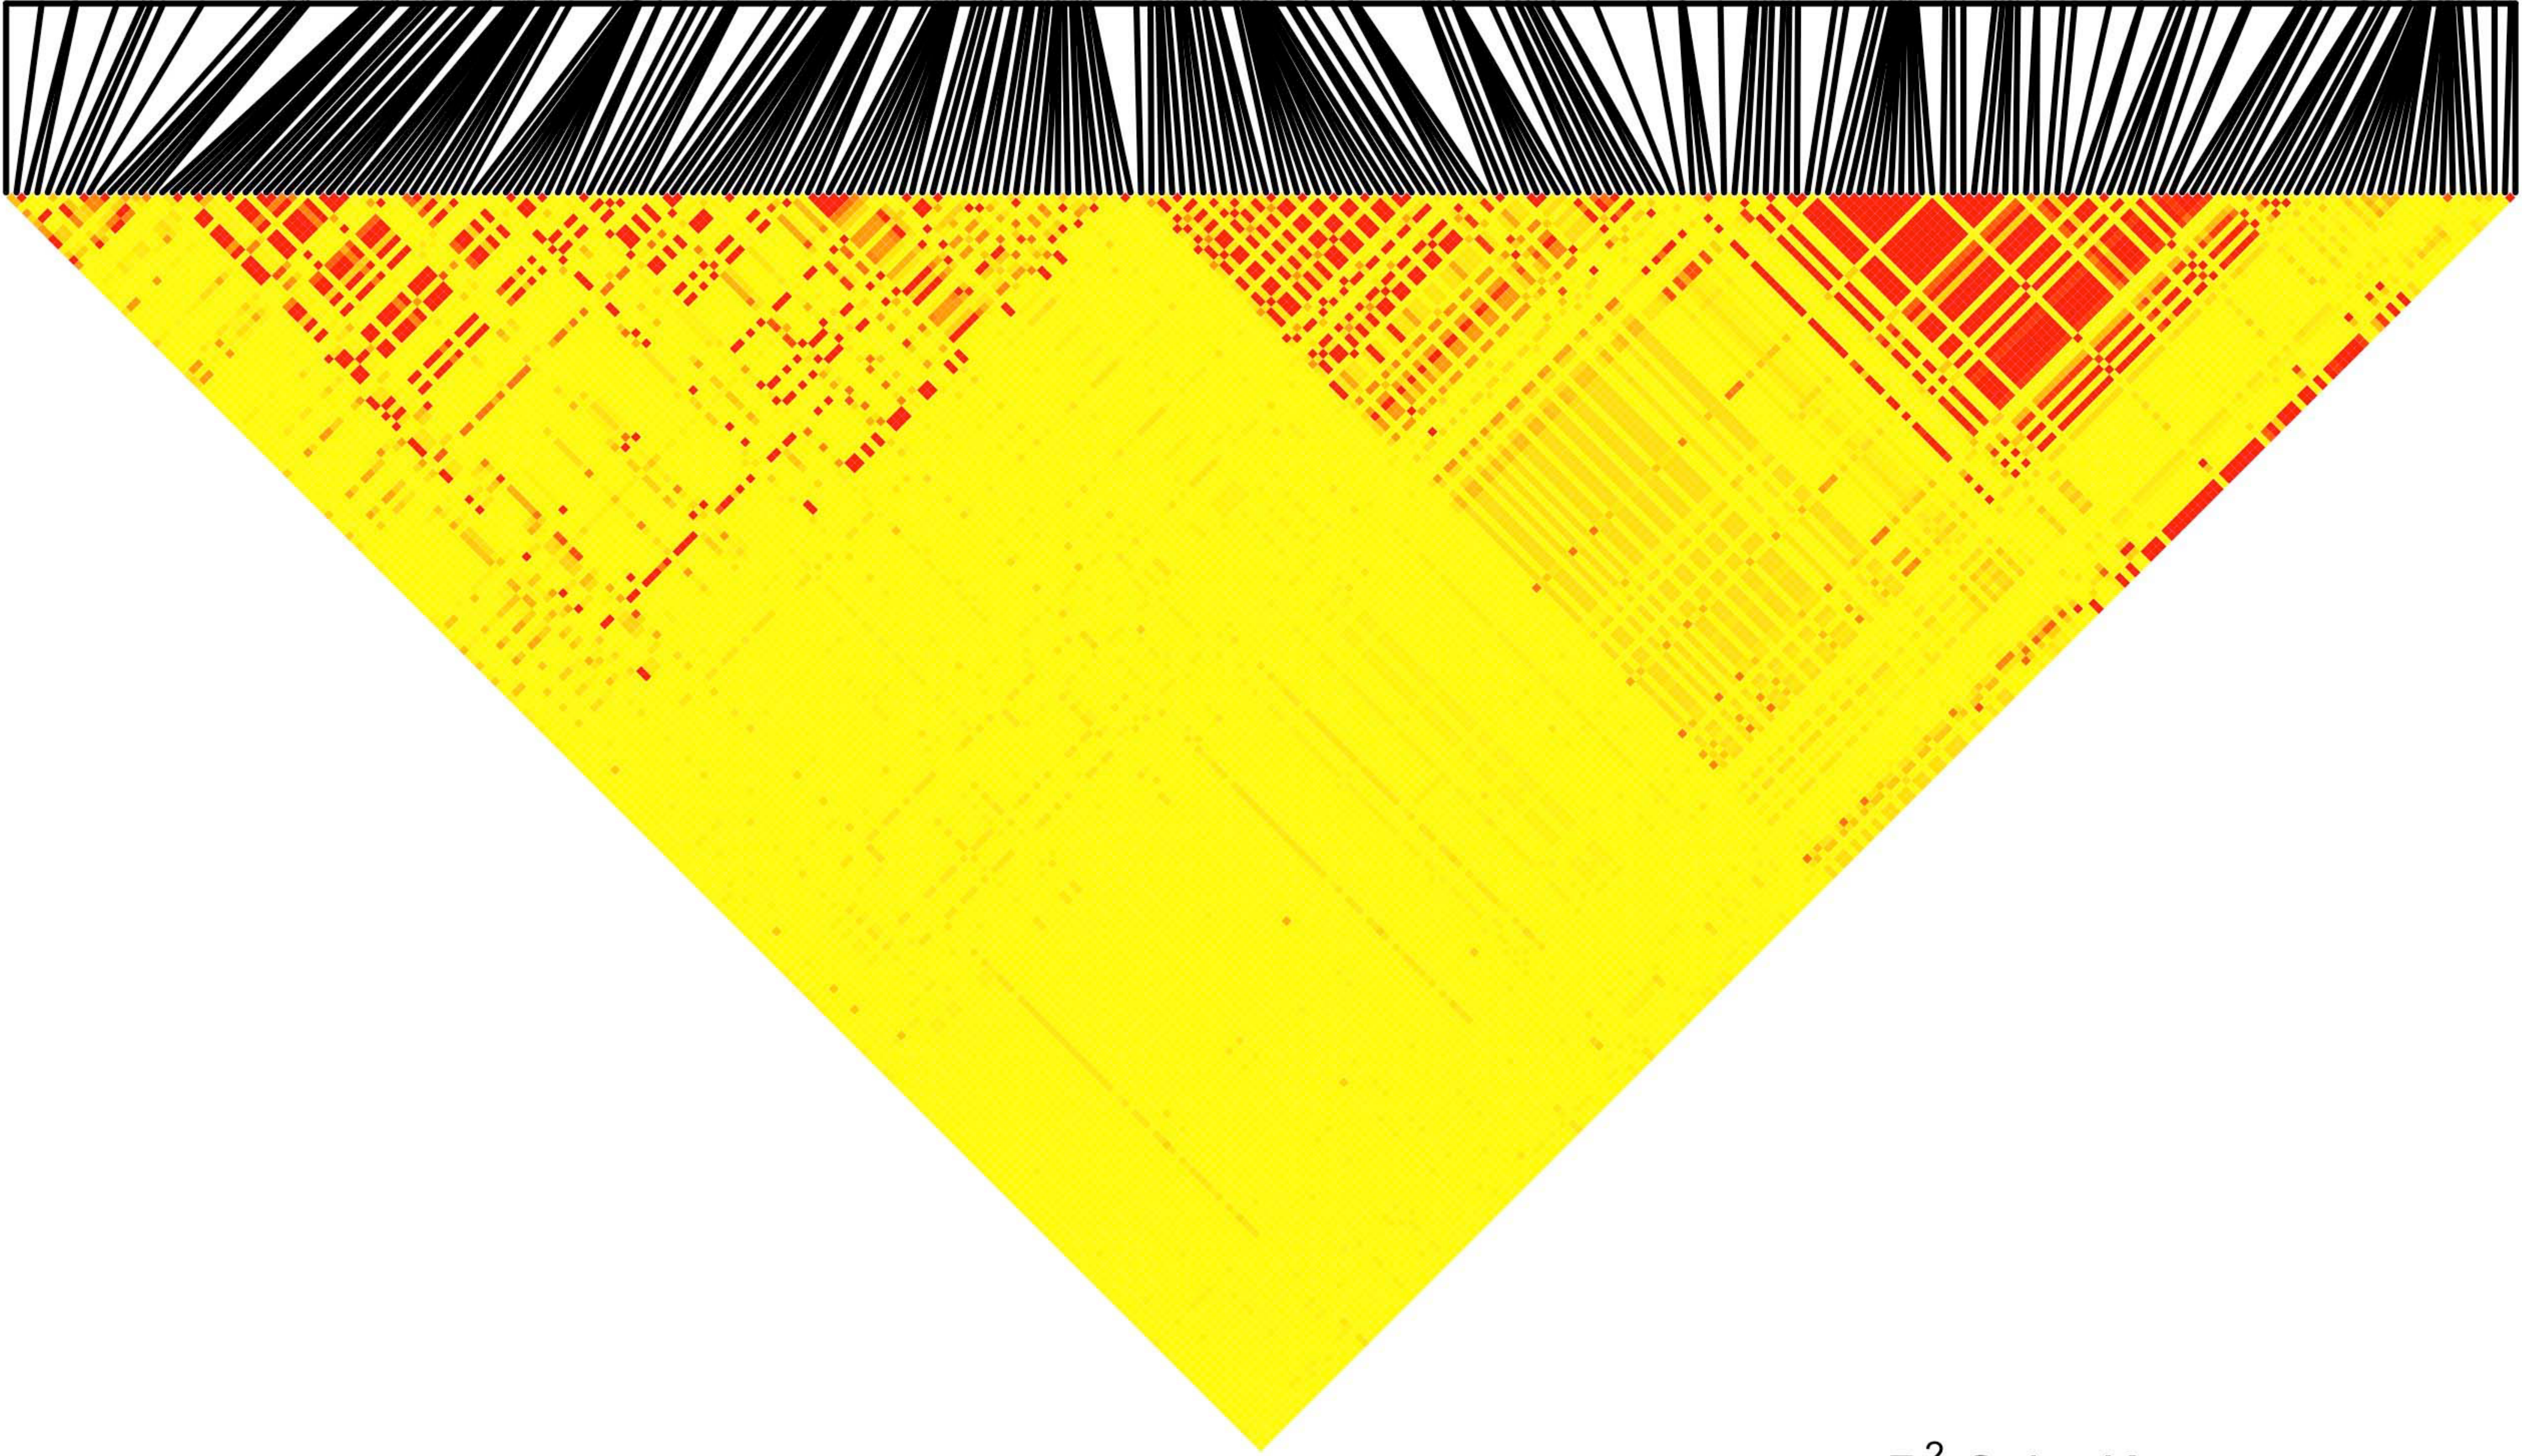

$R^2$  Color Key

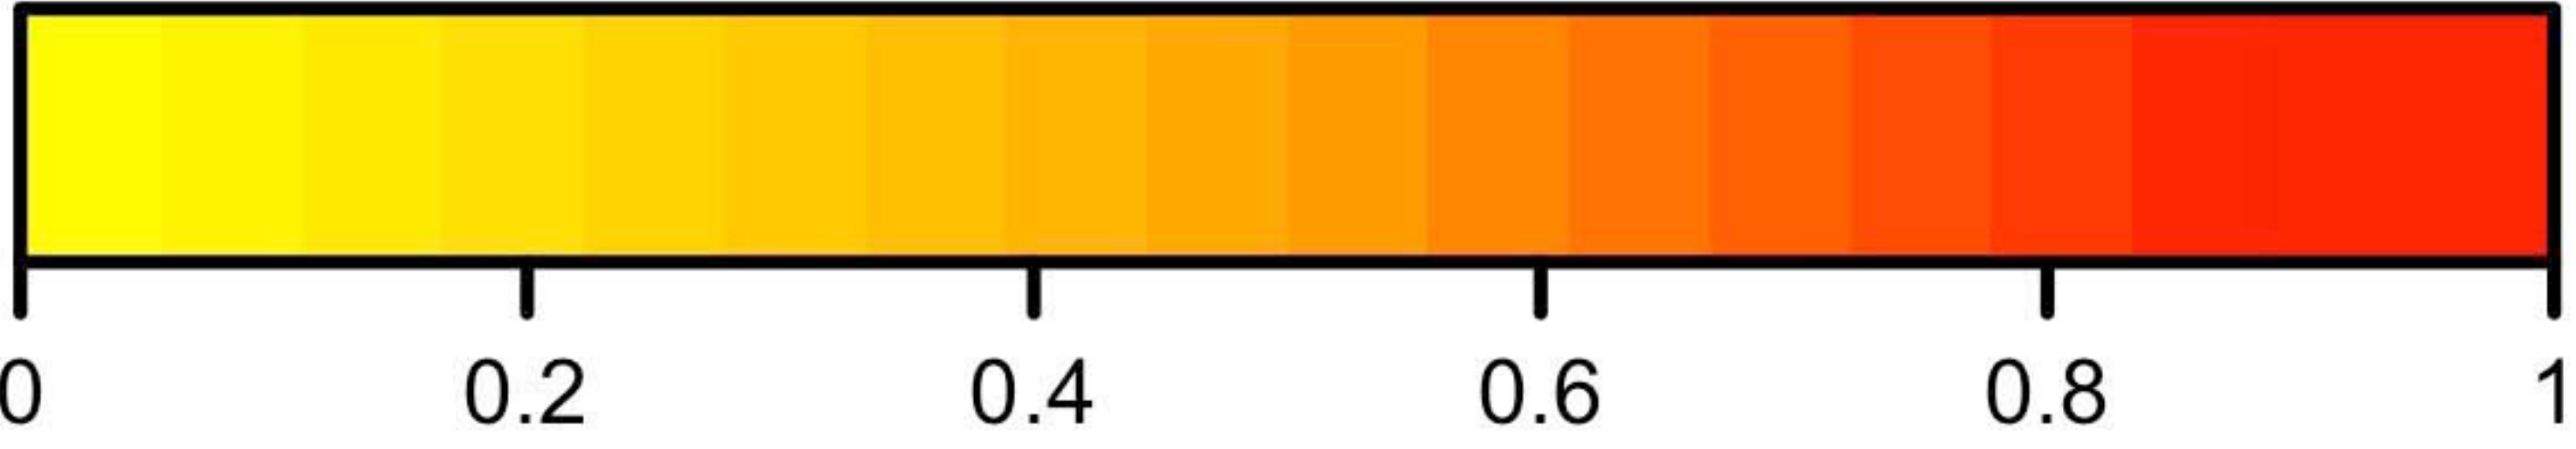

Supplementary Figure 3c

1p13.1

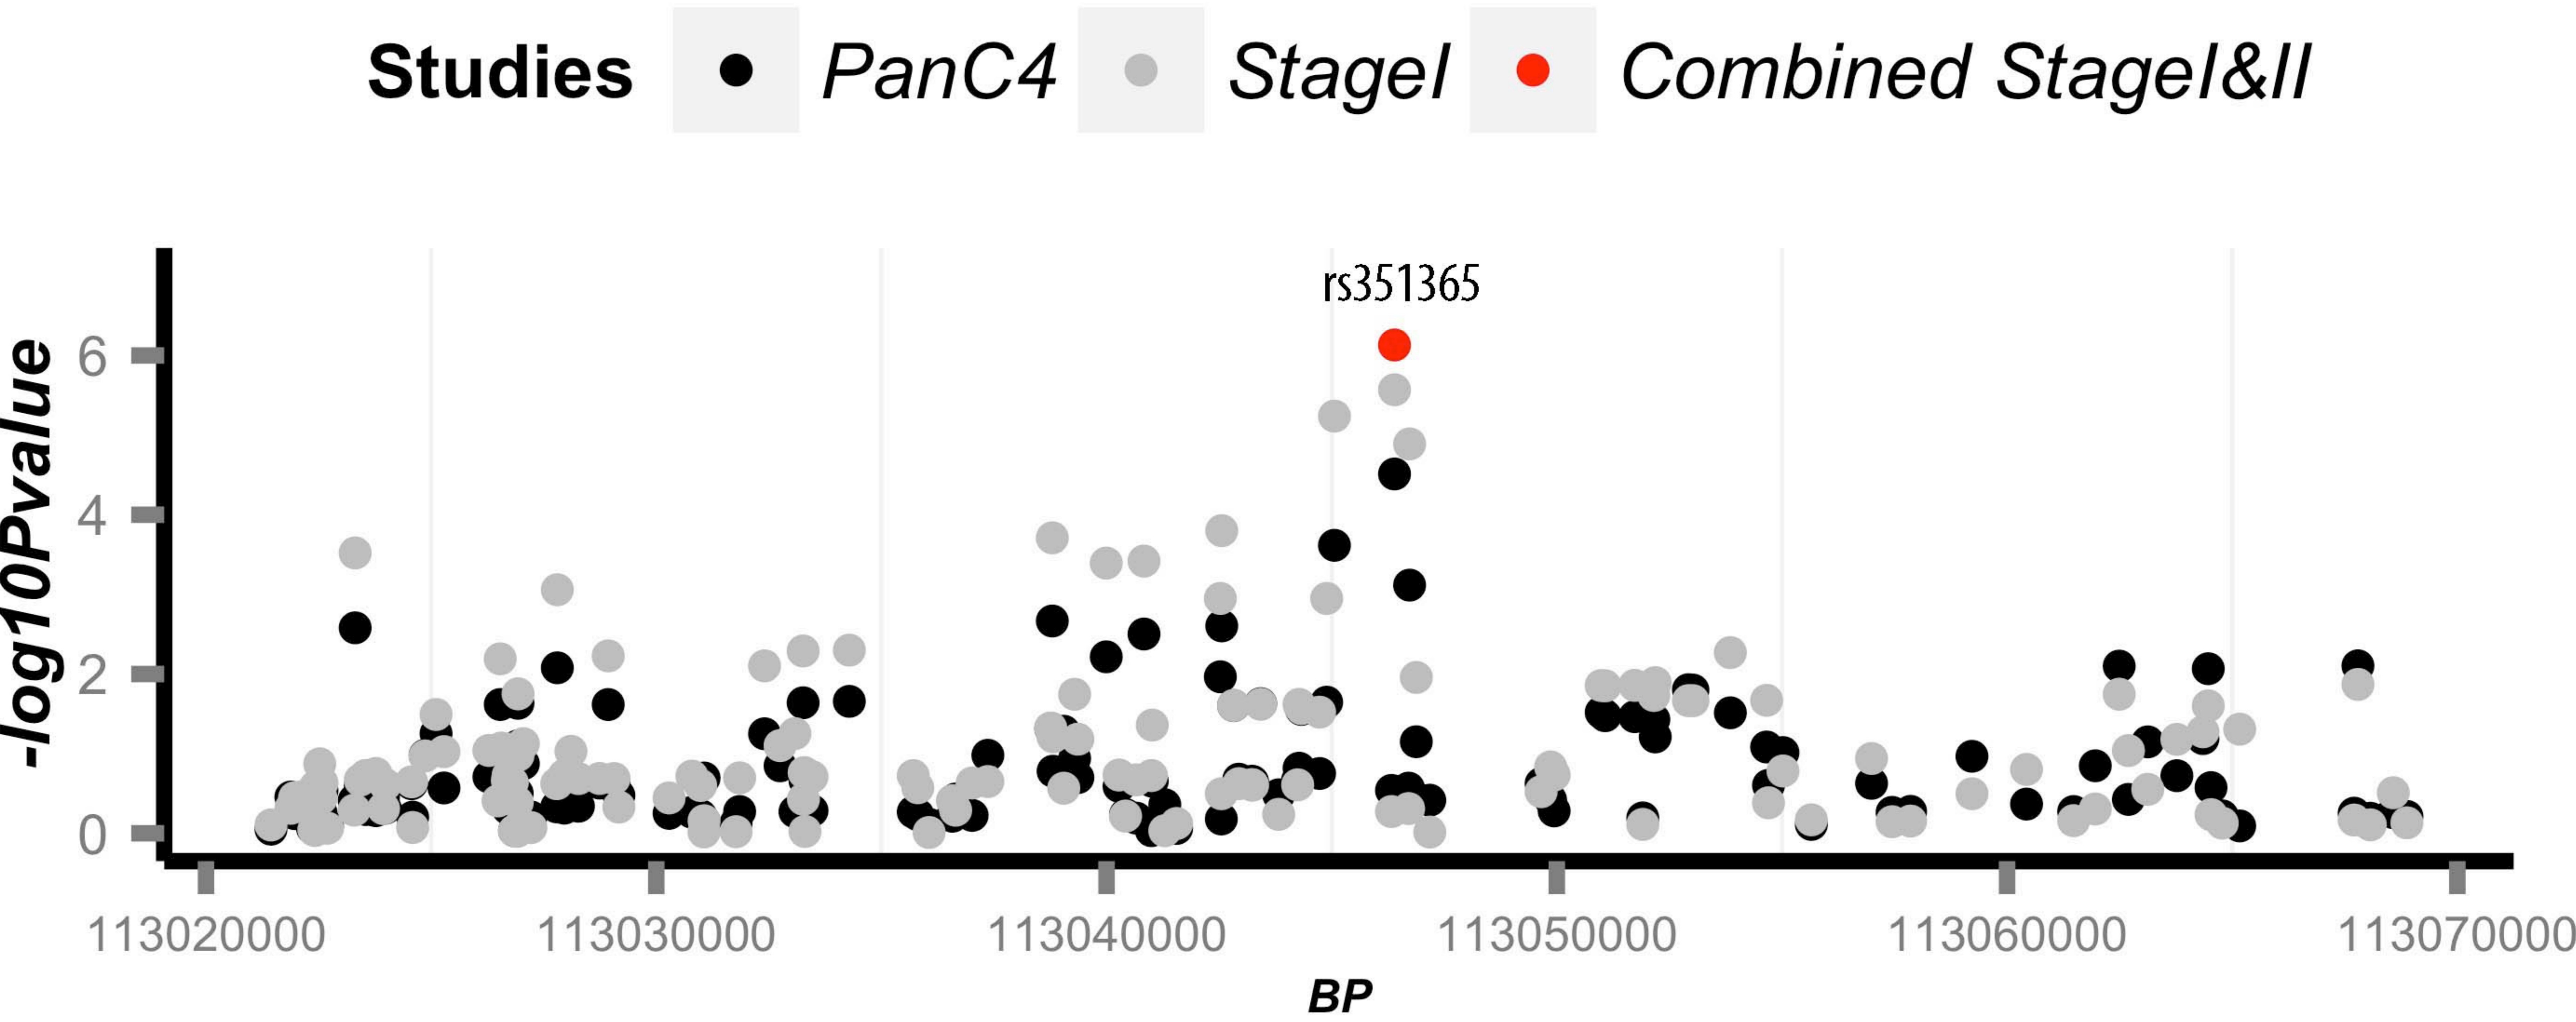

UCSC Genes Based on RefSeq, UniProt, GenBank, CCDS and Comparative Genomics

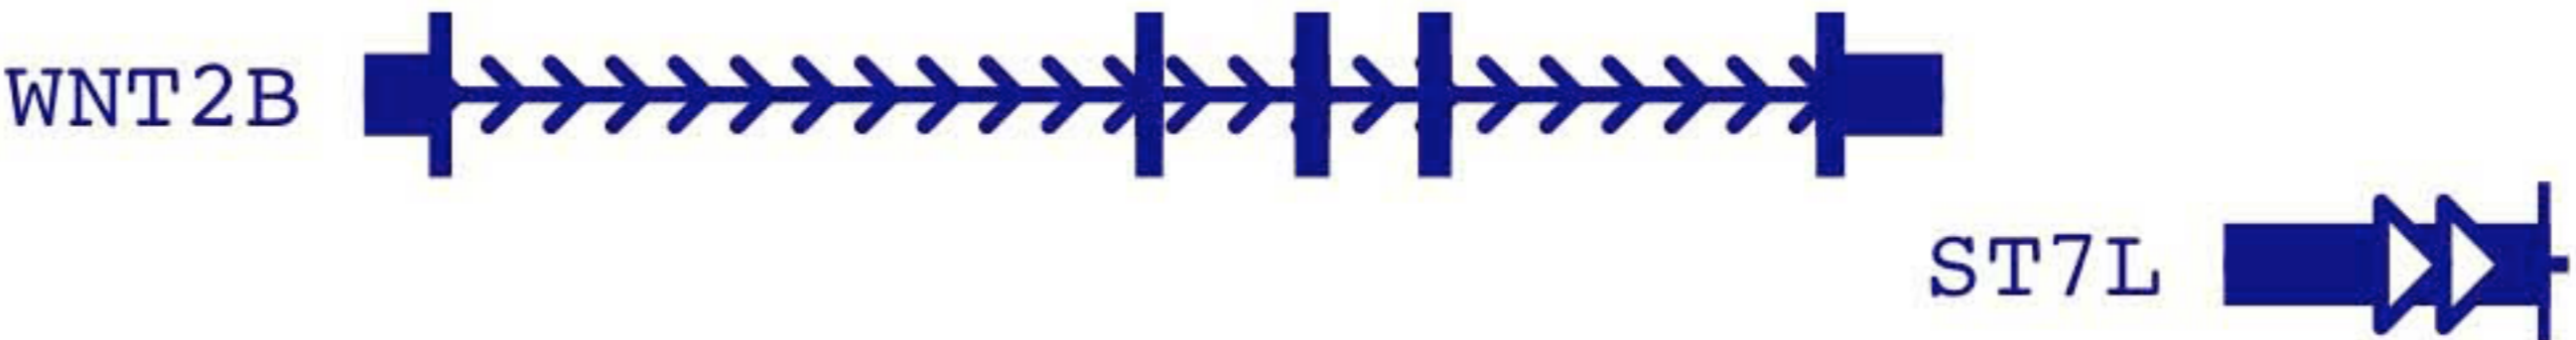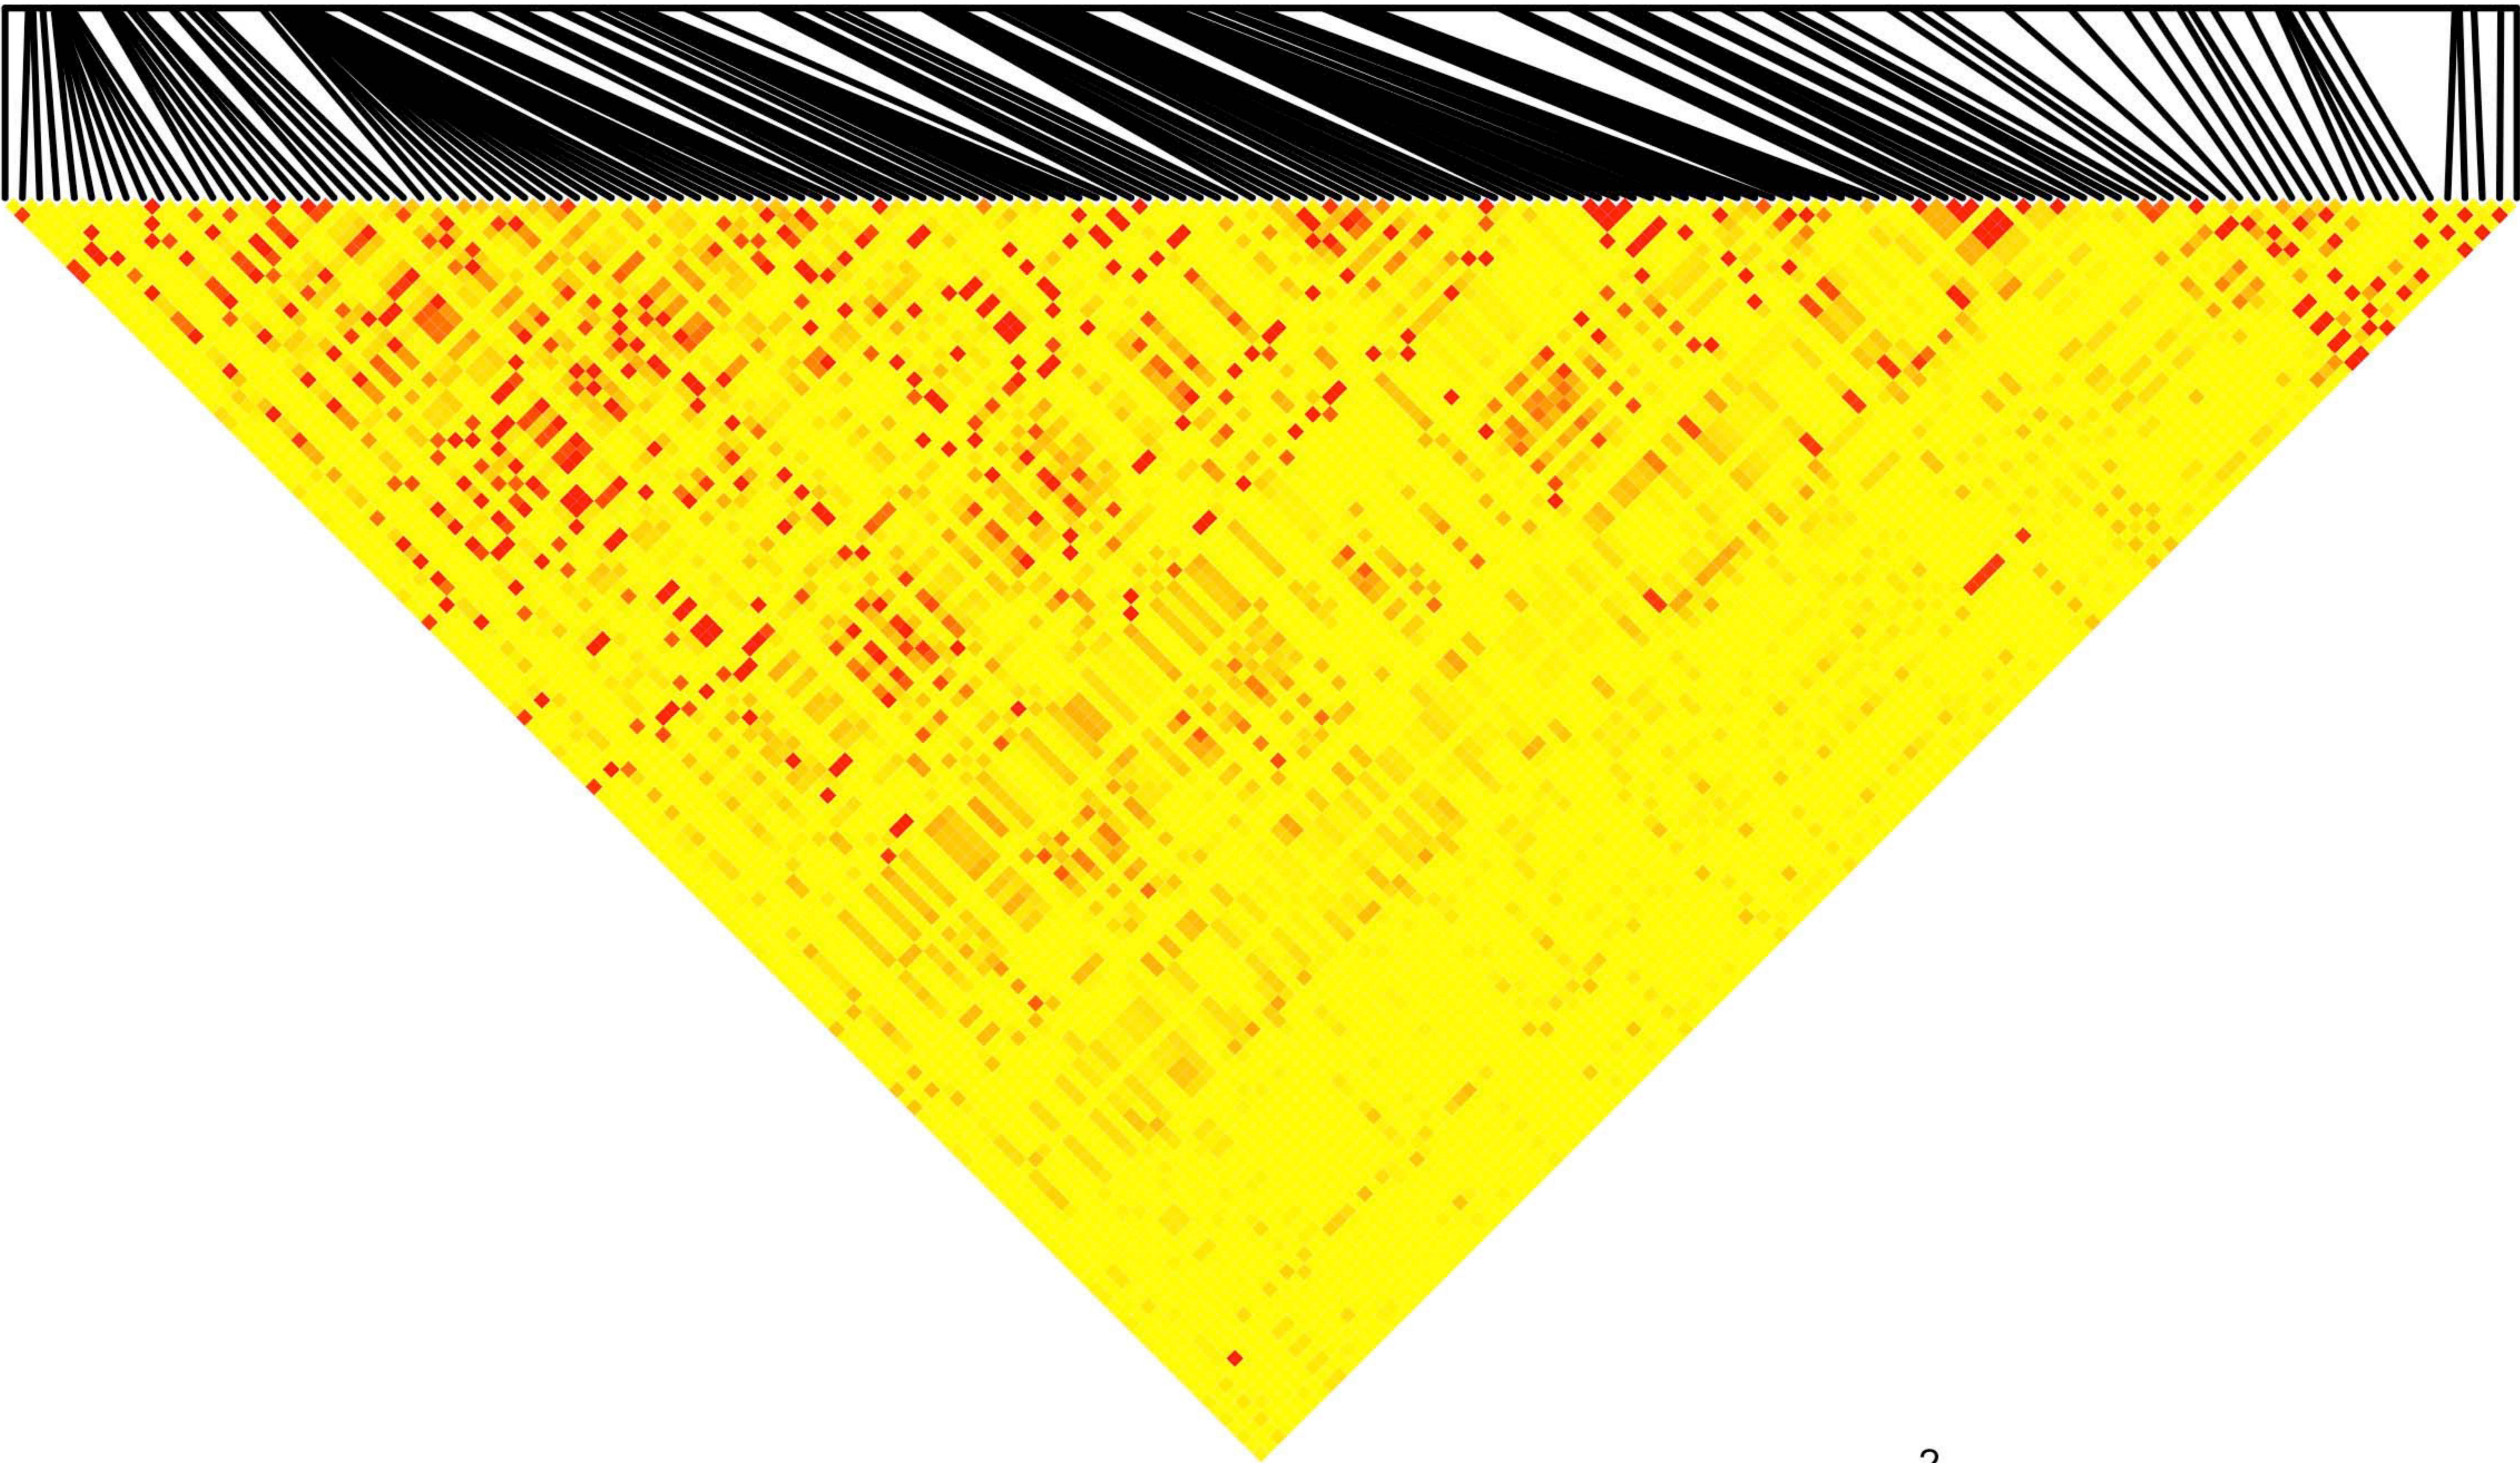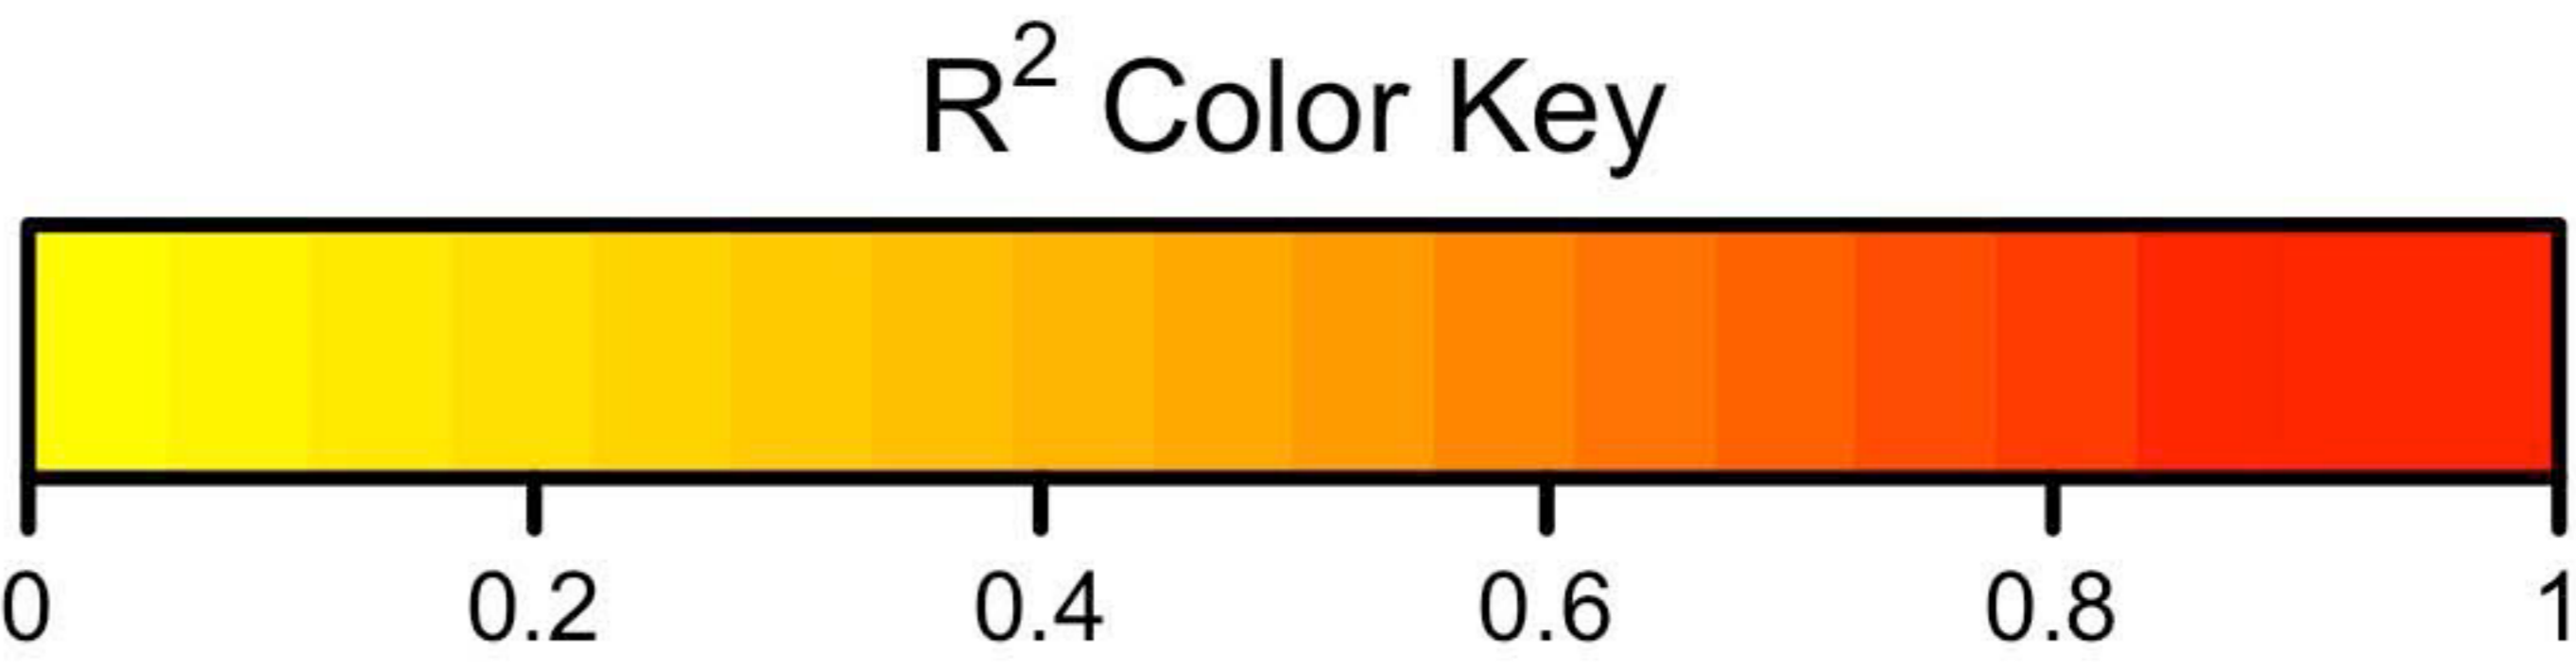

Supplementary Figure 3d

20q13.11

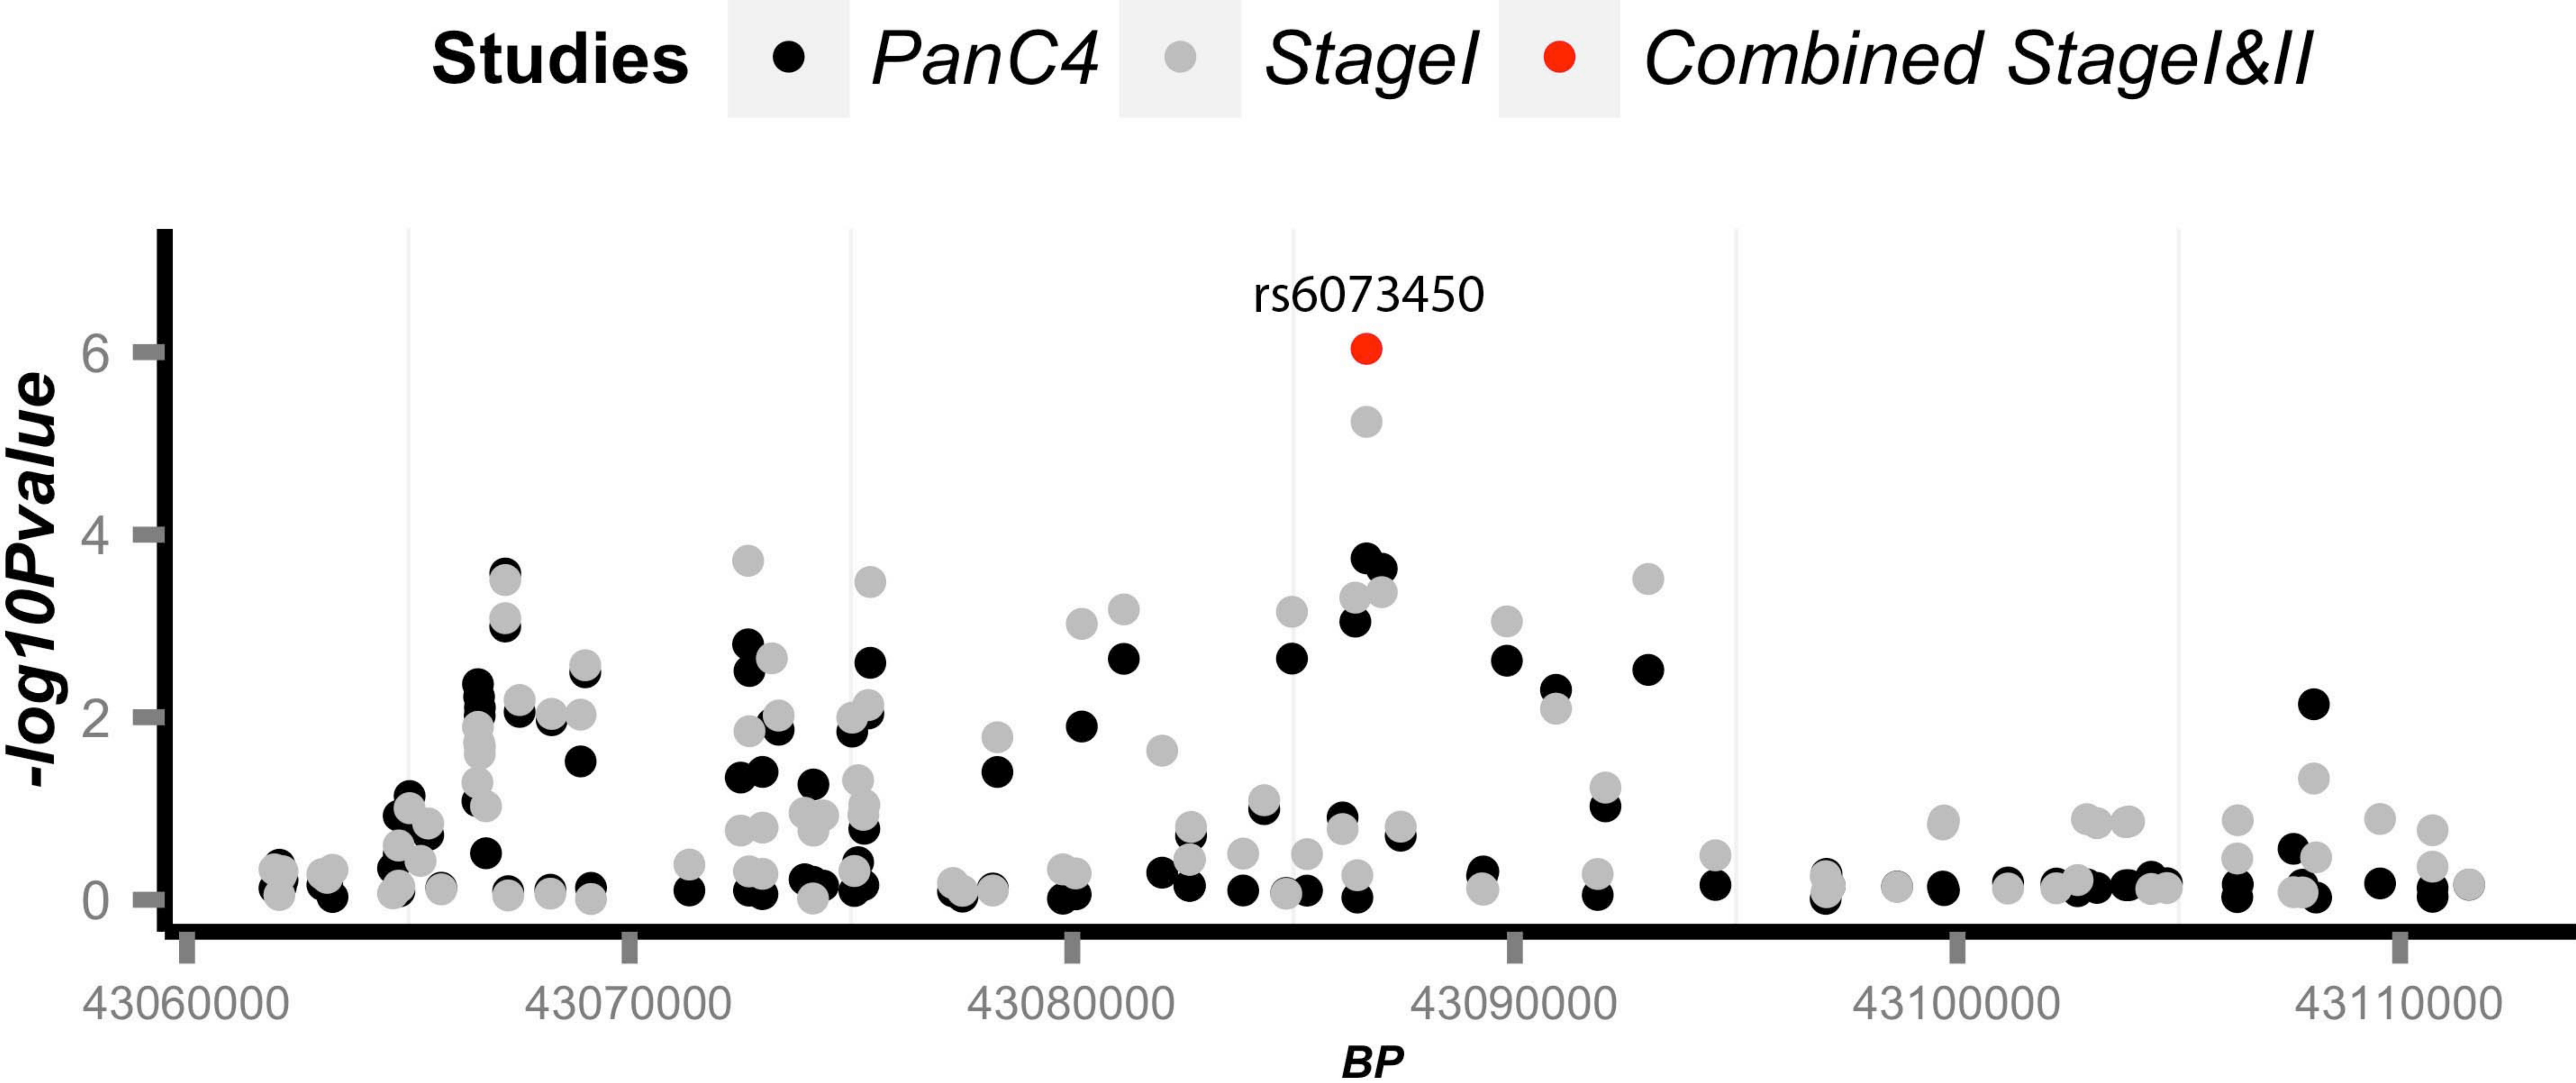

UCSC Genes Based on RefSeq, UniProt, GenBank, CCDS and Comparative Genomics

Metazoa\_SRP

TTPAL

C20orf62

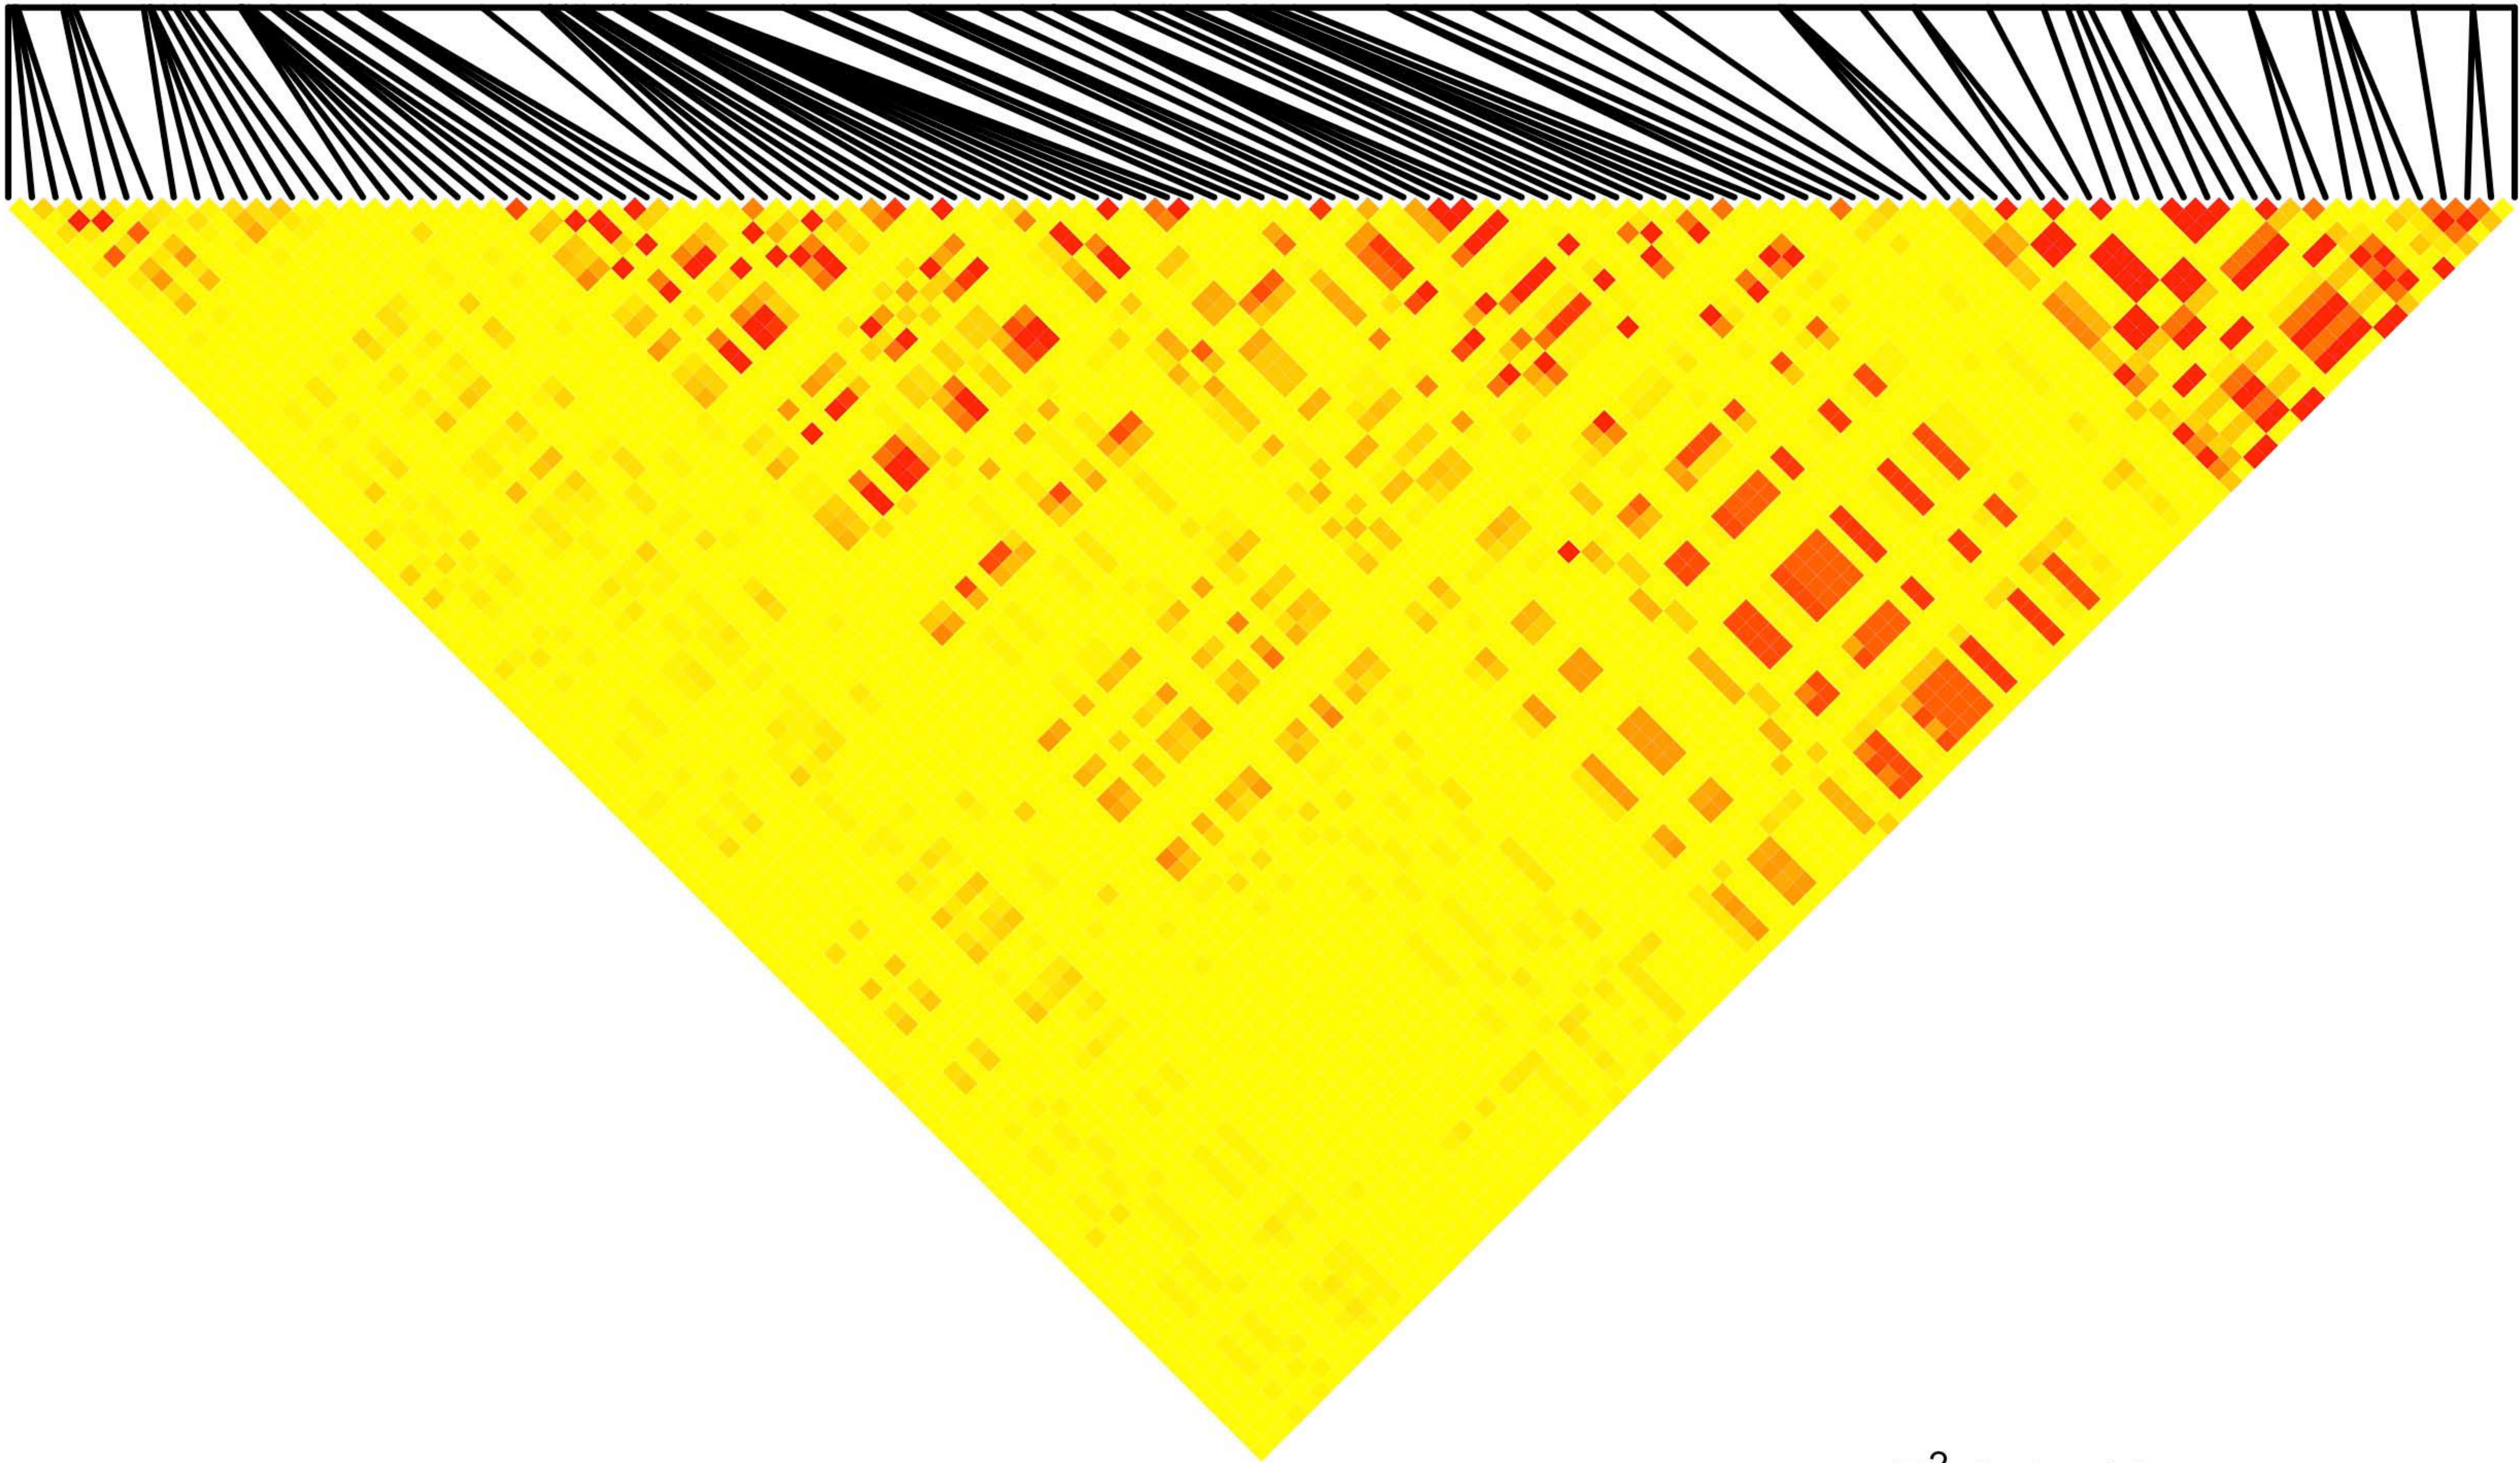

R<sup>2</sup> Color Key

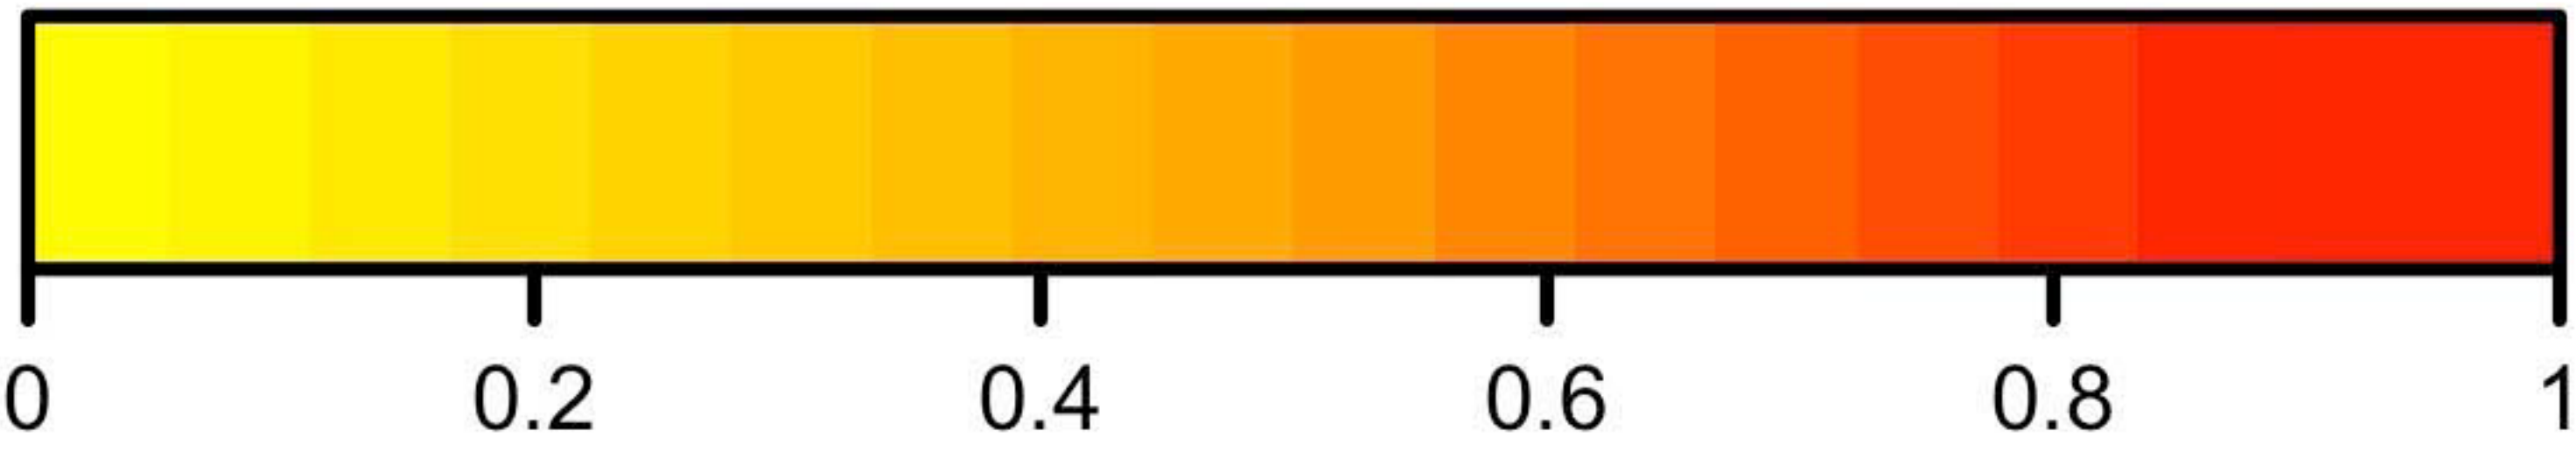

Supplementary Figure 3e

9q31.3

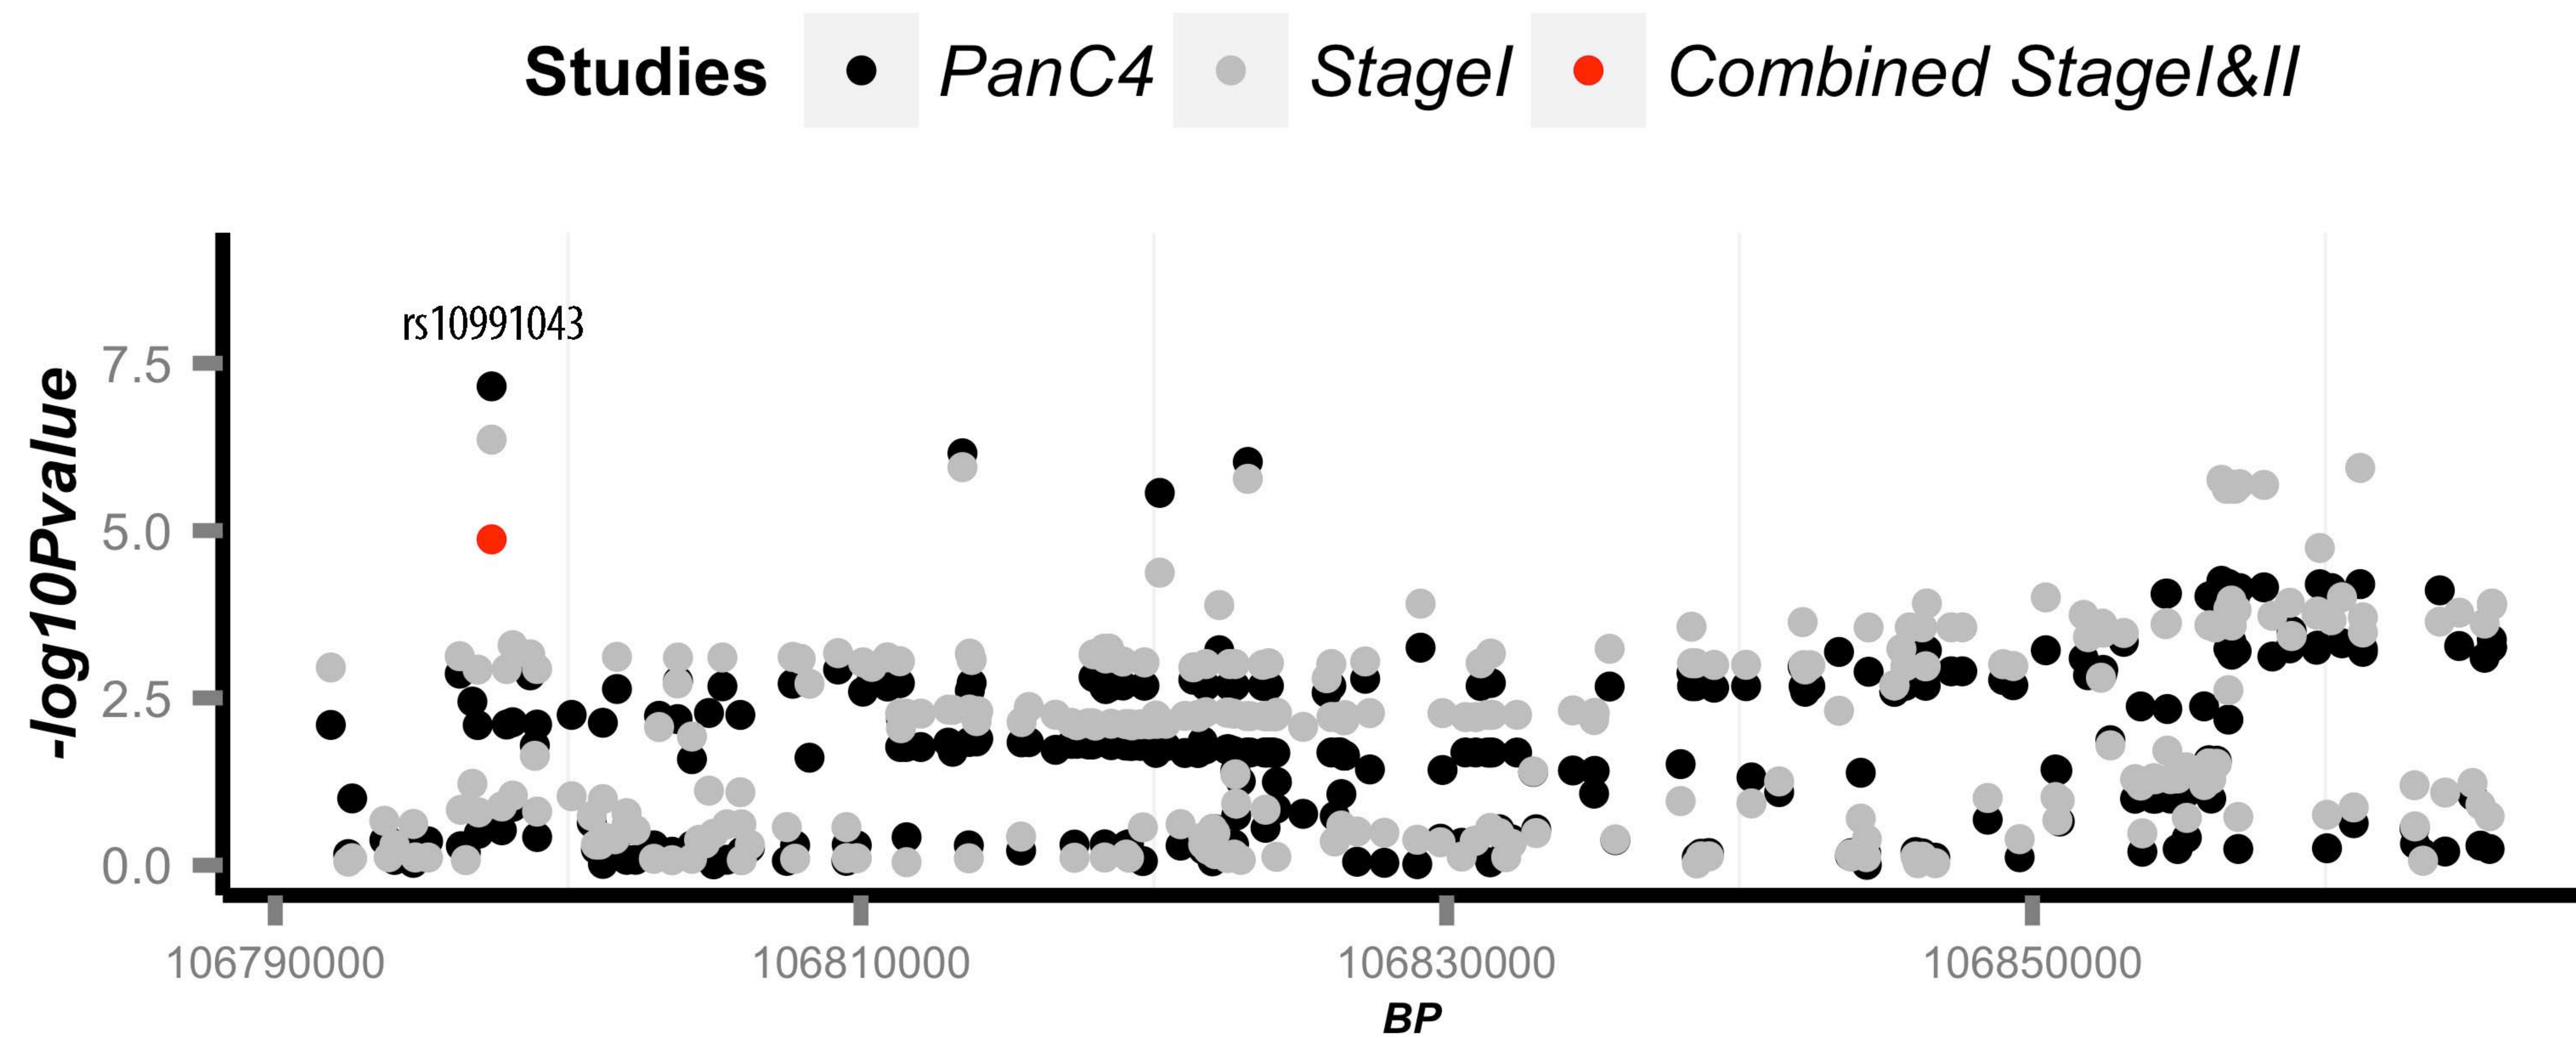

UCSC Genes Based on RefSeq, UniProt, GenBank, CCDS and Comparative Genomics

SMC2

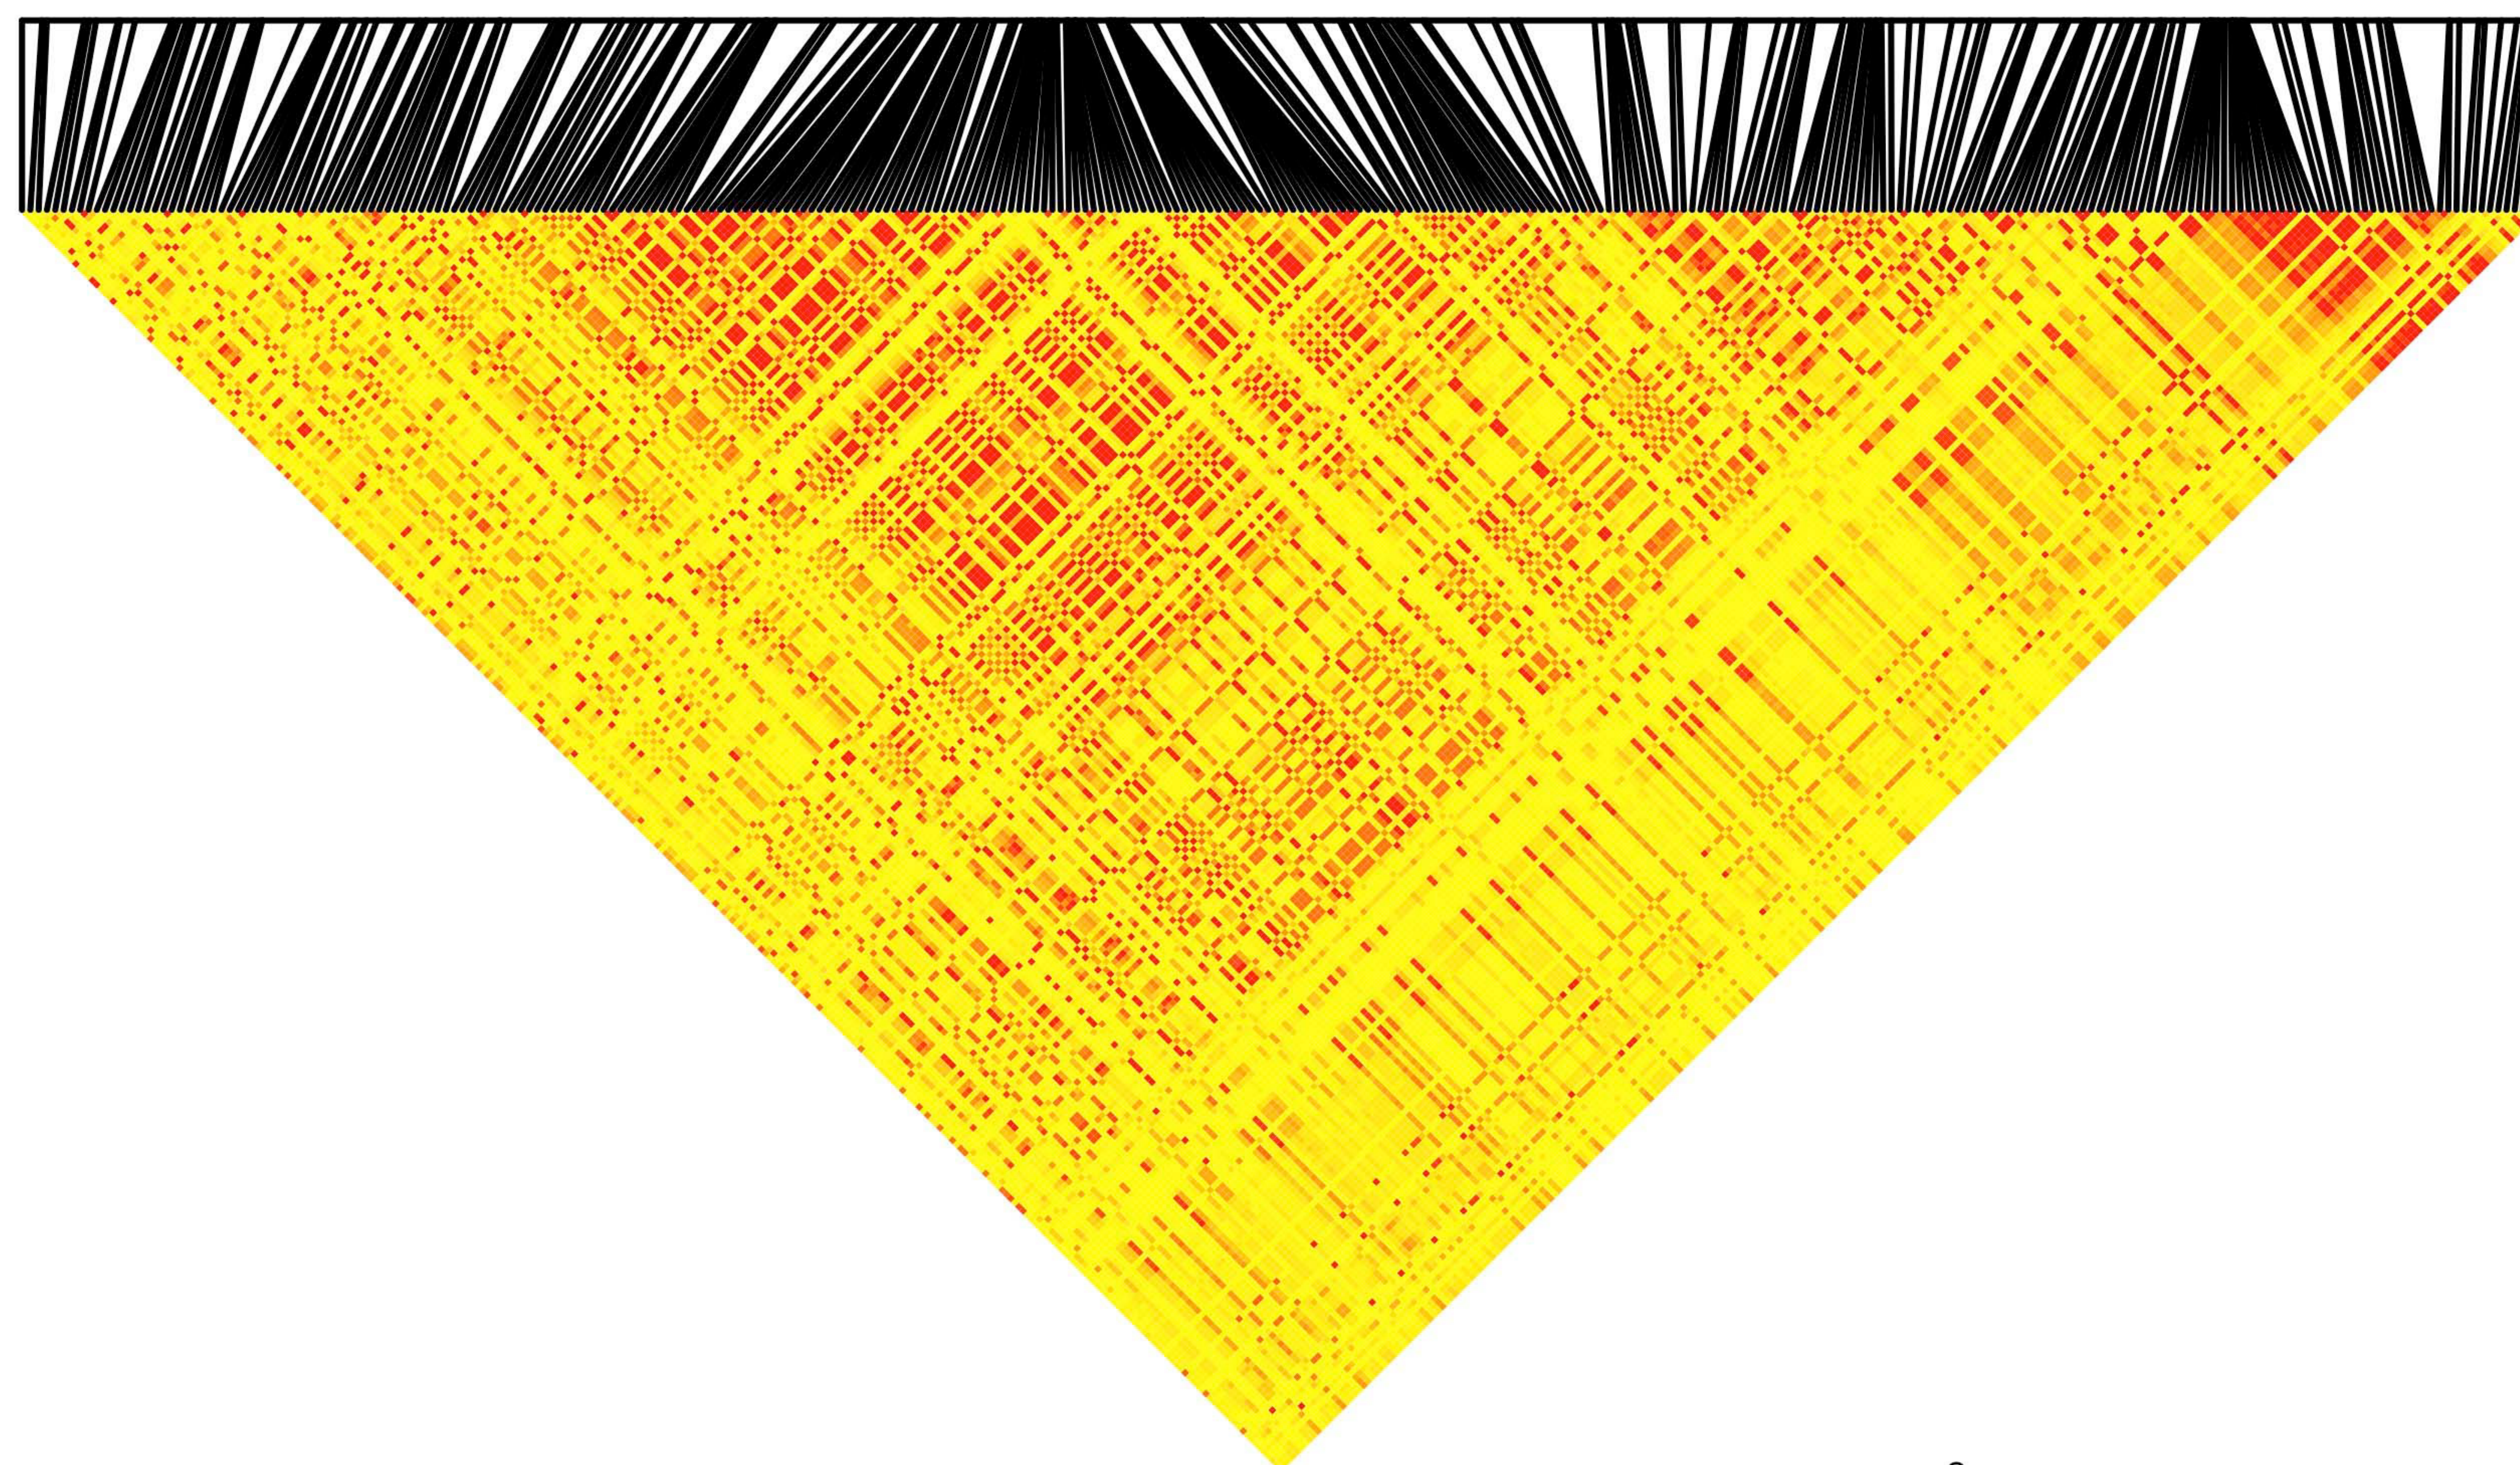

$R^2$  Color Key

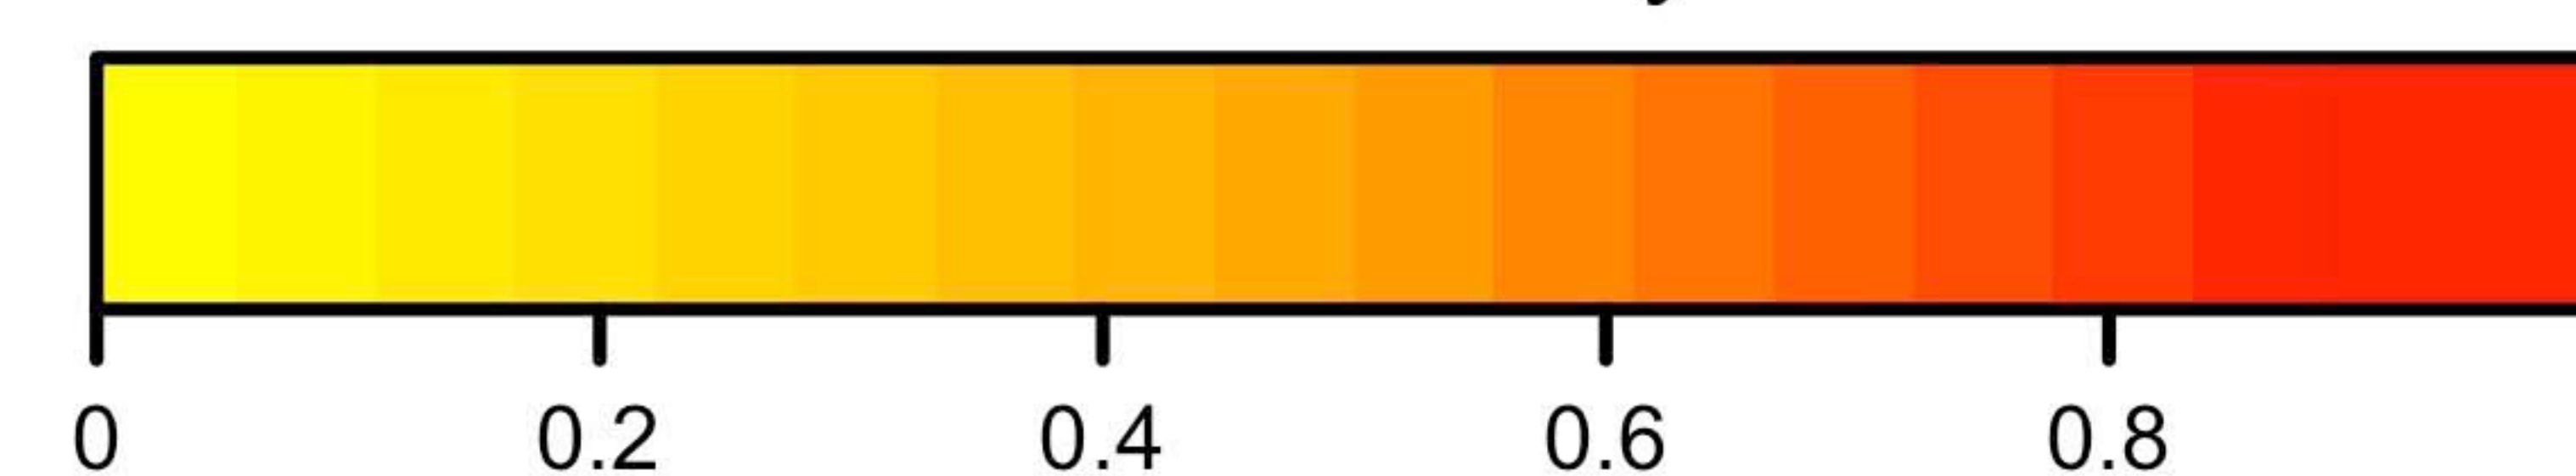

Supplementary Figure 4

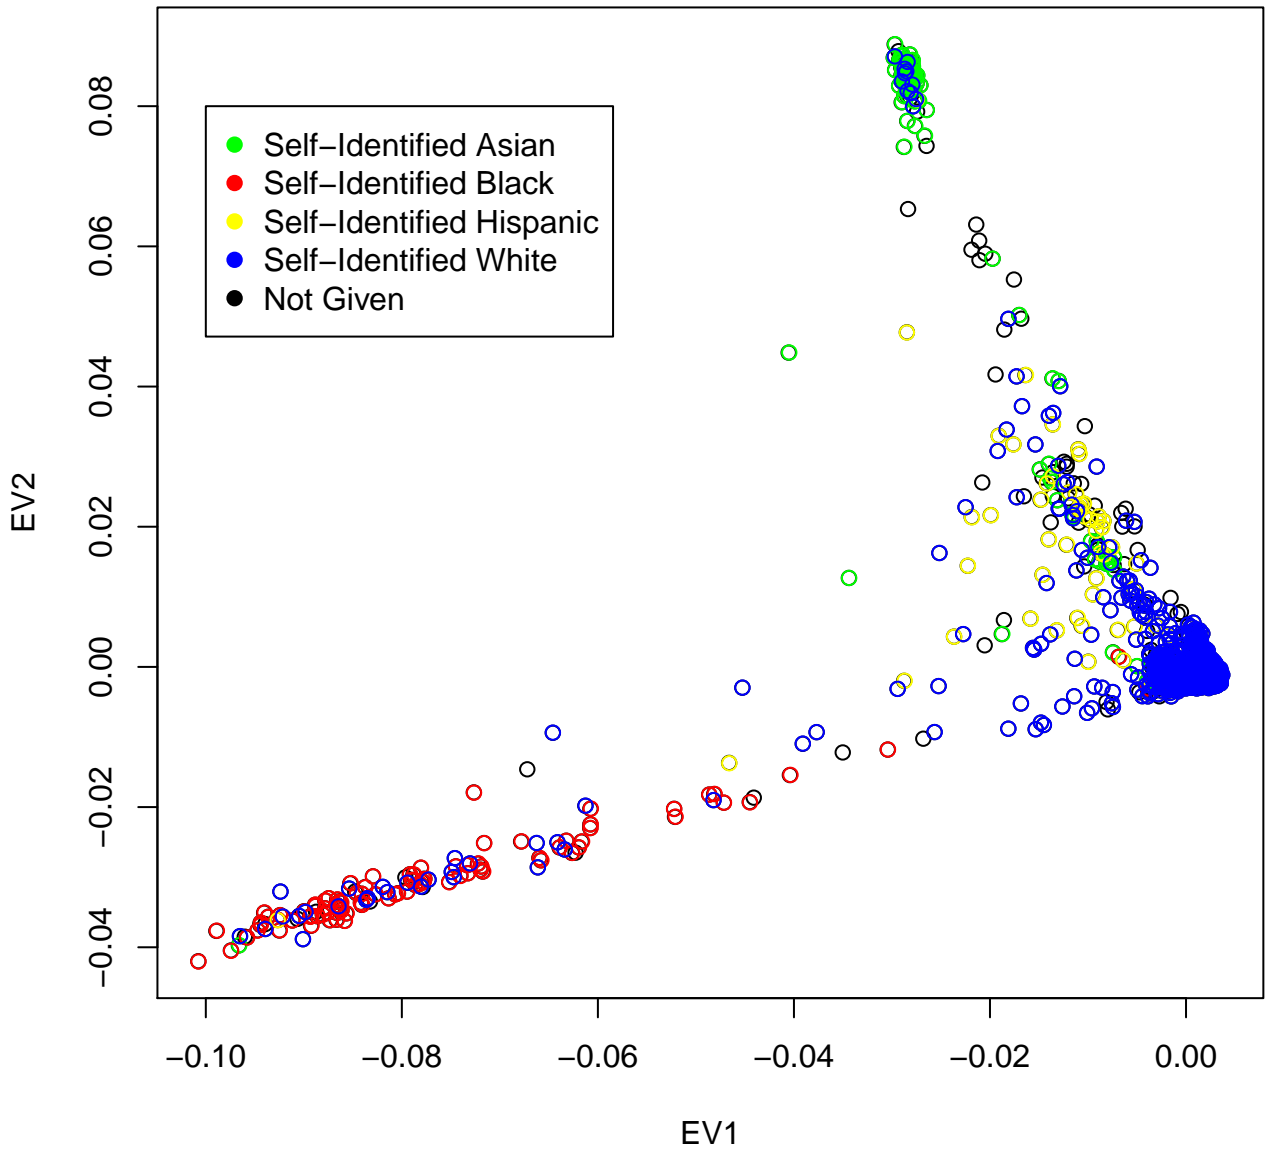

Supplementary Figure 5a

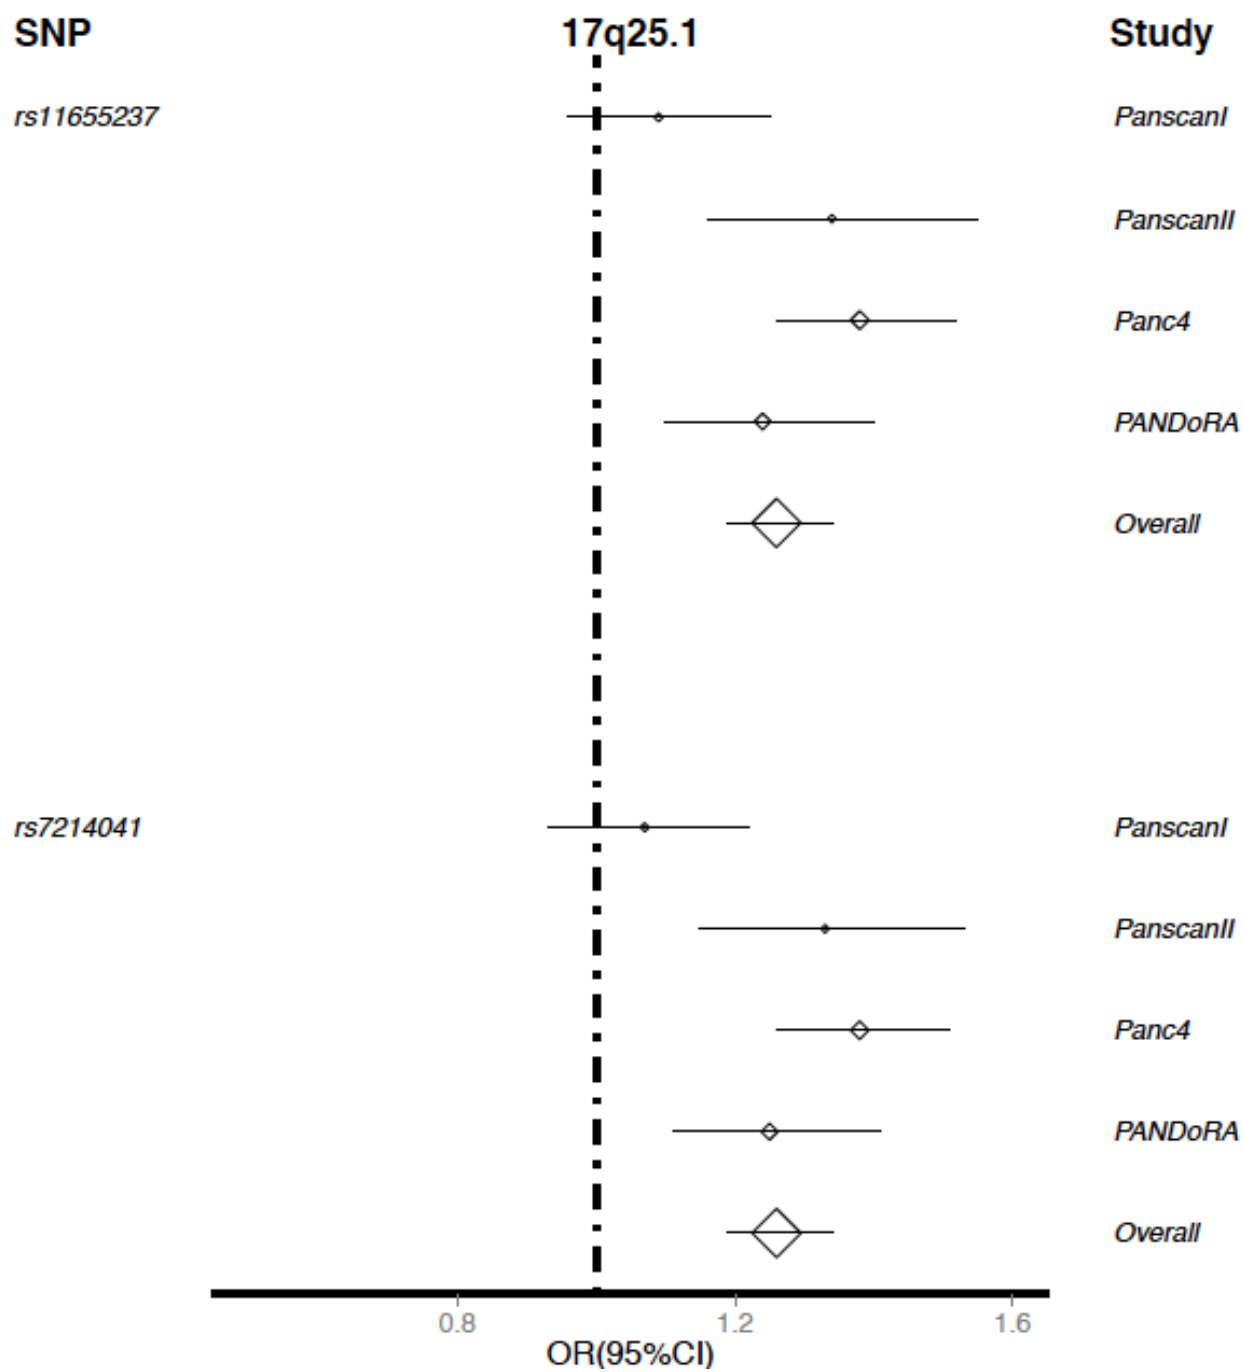

Supplementary Figure 5b

SNP

rs9854771

3q29

Study

*PancscanI*

*PancscanII*

*Panc4*

*PANDoRA*

*Overall*

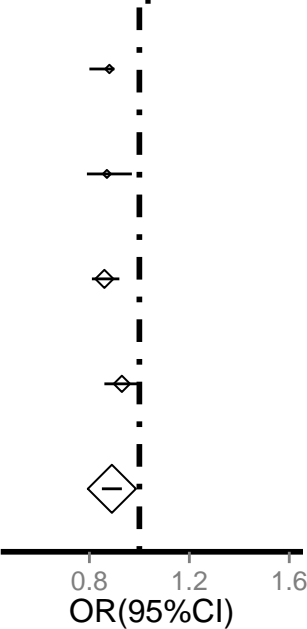

Supplementary Figure 5c

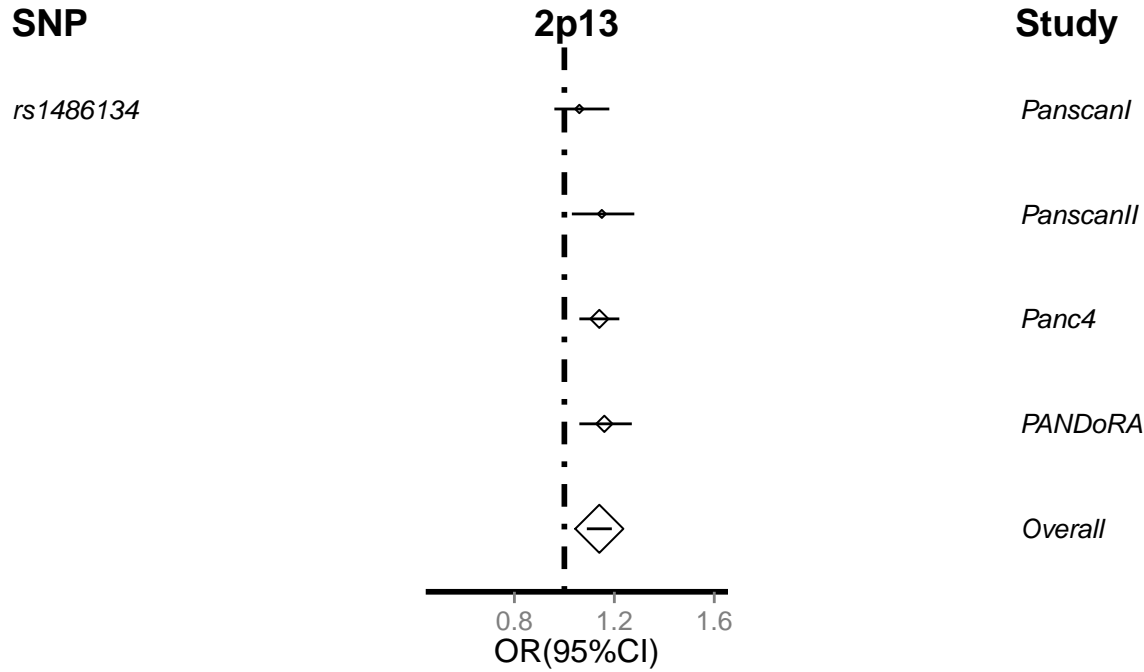

# Supplementary Figure 5d

**SNP**

*rs1768860*

**7p13**

**Study**

*PancscanI*

*PancscanII*

*Panc4*

*PANDoRA*

*Overall*

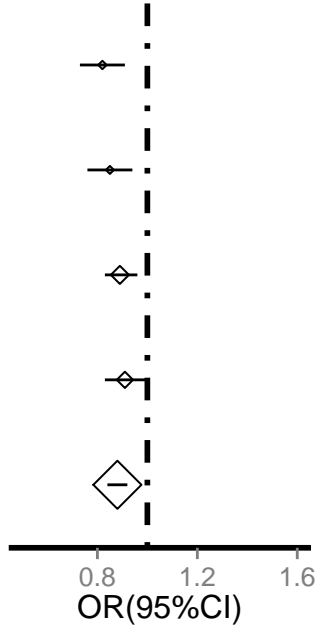

Supplementary Figure 5e

**SNP**

*rs1517037*

**18q21.2**

**Study**

*PancscanI*

*PancscanII*

*Panc4*

*PANDoRA*

*Overall*

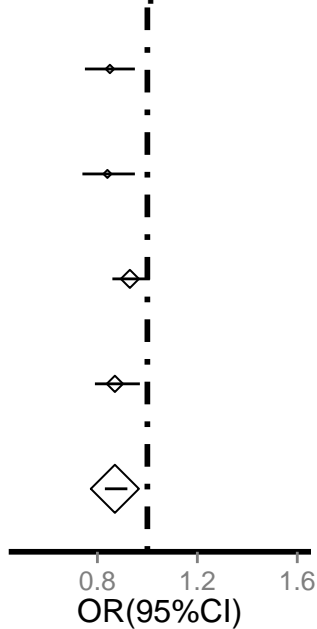

Supplementary Figure 5f

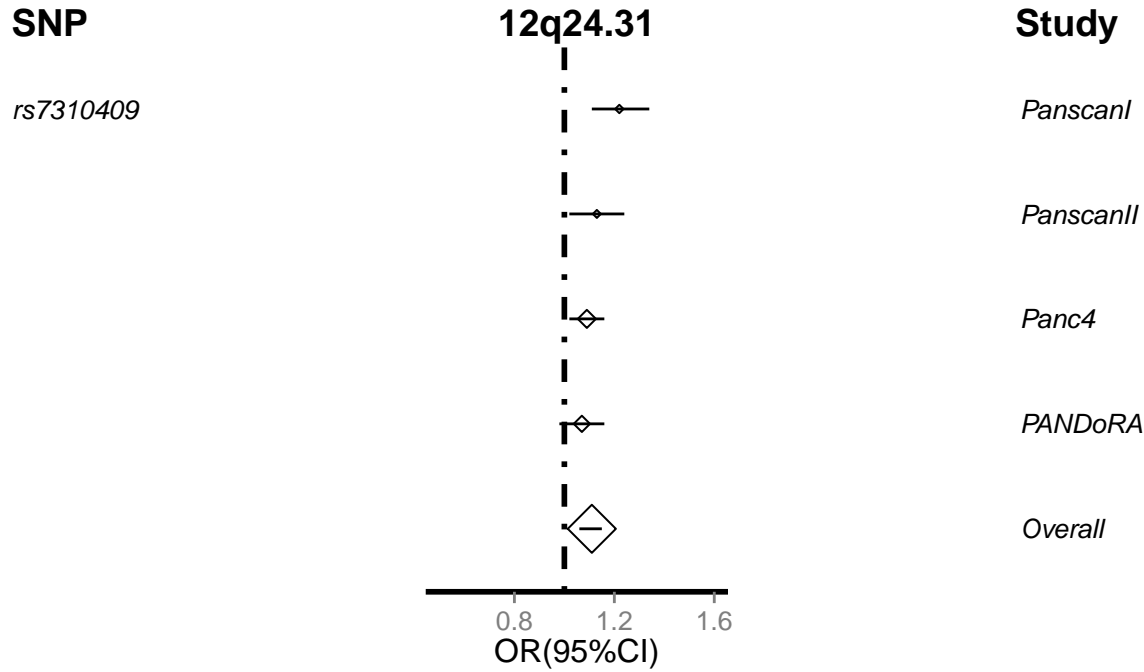

# Supplementary Figure 5g

**SNP**

*rs351365*

**1p13**

**Study**

*PancscanI*

*PancscanII*

*Panc4*

*PANDoRA*

*Overall*

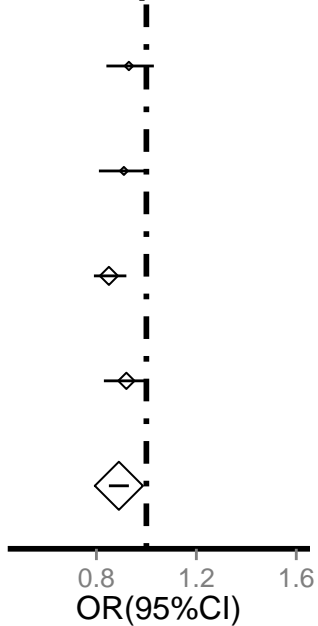

Supplementary Figure 5h

SNP

20q13.11

Study

*rs6073450*

*PancscanI*

*PancscanII*

*Panc4*

*PANDoRA*

*Overall*

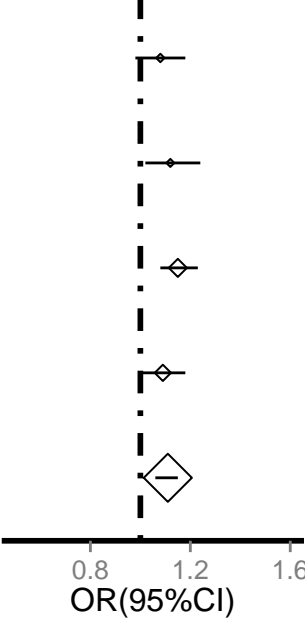

## Supplementary Figure 5i

**SNP**

*rs1099104*

**9q31.3**

**Study**

*PancscanI*

*PancscanII*

*Panc4*

*PANDoRA*

*Overall*

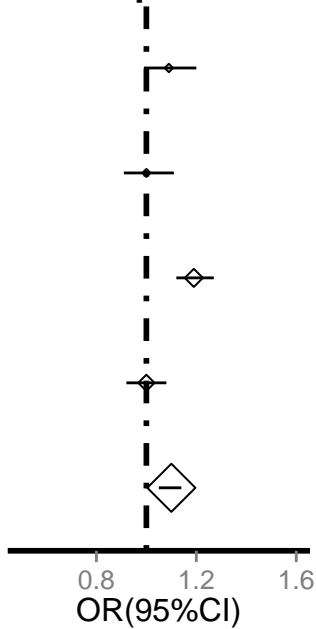

Supplement: NIHMS695333-supplement-1.pdf [file NIHMS695333-supplement-1.pdf]
